1 **Measles skin rash: infection of lymphoid and myeloid cells in the dermis**  
2 **precedes viral dissemination to keratinocytes in the epidermis**

3

4 **The pathogenesis of measles skin rash**

5

6 Brigitta M. Laksono<sup>1</sup>, Paola Fortugno<sup>2</sup>, Bernadien M. Nijmeijer<sup>3</sup>, Rory D. de Vries<sup>1</sup>, Sonia  
7 Cordisco<sup>2,#a</sup>, Stefan van Nieuwkoop<sup>1</sup>, Thijs Kuiken<sup>1</sup>, Teunis B. H. Geijtenbeek<sup>3</sup>, W. Paul  
8 Duprex<sup>4</sup>, Francesco Brancati<sup>2,#a</sup>, Rik L. de Swart<sup>1\*</sup>

9

10 <sup>1</sup>Department of Viroscience, Erasmus MC, 3015 CN Rotterdam, the Netherlands

11 <sup>2</sup>Laboratory of Molecular and Cell Biology, Istituto Dermopatico dell'Immacolata, IDI-IRCCS,  
12 00167 Rome, Italy

13 <sup>3</sup>Department of Experimental Immunology, Amsterdam Infection and Immunity Institute,  
14 Amsterdam University Medical Centres, University of Amsterdam, Amsterdam, the  
15 Netherlands

16 <sup>4</sup>Centre for Vaccine Research, University of Pittsburgh School of Medicine, Pennsylvania,  
17 United States of America

18 <sup>#a</sup> Current address: Department of Life, Health and Environmental Sciences, University of  
19 L'Aquila, L'Aquila, Italy

20

21 \*Correspondence to: Dr. Rik L. de Swart, Department of Viroscience, Erasmus MC.  
22 Wytemaweg 80, 3015 CN Rotterdam, The Netherlands. T: +31 10 7044280; F: +31 10 7044760;

23 E: [r.deswart@erasmusmc.nl](mailto:r.deswart@erasmusmc.nl)

## 24 **Abstract**

25 Measles is characterised by fever and a maculopapular skin rash, which is associated with  
26 immune clearance of measles virus (MV)-infected cells. Histopathological analyses of skin  
27 biopsies from humans and non-human primates (NHPs) with measles rash have identified  
28 MV-infected keratinocytes and mononuclear cells in the epidermis, around hair follicles and  
29 near sebaceous glands. Here, we address the pathogenesis of measles skin rash by combining  
30 data from experimentally infected NHPs, *ex vivo* infection of human skin sheets and *in vitro*  
31 infection of primary human keratinocytes. Longitudinal analysis of the skin of experimentally  
32 MV-infected NHPs demonstrated that infection in the skin precedes onset of rash by several  
33 days. MV infection was initiated in lymphoid and myeloid cells in the dermis before  
34 dissemination to the epidermal keratinocytes. These data were in good concordance with *ex*  
35 *vivo* MV infections of human skin sheets, in which dermal cells were more targeted than the  
36 epidermal ones. To address viral dissemination to the epidermis and to determine whether  
37 the dissemination is receptor-dependent, we performed experimental infections of primary  
38 keratinocytes collected from healthy or nectin-4-deficient donors. These experiments  
39 demonstrated that MV infection of keratinocytes is nectin-4-dependent, and nectin-4  
40 expression was higher in differentiated than in proliferating keratinocytes. Based on these  
41 data, we hypothesise that measles skin rash is initiated by migrating MV-infected  
42 lymphocytes that infect dermal skin-resident CD150<sup>+</sup> immune cells. The infection is  
43 subsequently disseminated from the dermal papillae to nectin-4<sup>+</sup> keratinocytes in the basal  
44 epidermis. Lateral spread of MV infection is observed in the superficial epidermis, most likely  
45 due to the higher level of nectin-4 expression on differentiated keratinocytes. Finally, MV-  
46 infected cells are cleared by infiltrating immune cells, causing hyperaemia and oedema, which  
47 give the appearance of morbilliform skin rash.

48

49 **Author Summary**

50 Several viral infections are associated with skin rash, including parvovirus B19, human  
51 herpesvirus type 6, dengue virus and rubella virus. However, the archetype virus infection  
52 that leads to skin rash is measles. Although all of these viral exanthemata often appear similar,  
53 their pathogenesis is different. In the case of measles, the appearance of skin rash is a sign  
54 that the immune system is clearing MV-infected cells from the skin. How the virus reaches  
55 the skin and is locally disseminated remains unknown. Here we combine observations and  
56 expertise from pathologists, dermatologists, virologists and immunologists to delineate the  
57 pathogenesis of measles skin rash. We show that MV infection of dermal myeloid and  
58 lymphoid cells precedes viral dissemination to the epidermal keratinocytes. We speculate  
59 that immune-mediated clearance of these infected cells results in hyperaemia and oedema,  
60 explaining the redness of the skin and the slightly elevated spots of the morbilliform rash.

61

## 62 **Introduction**

63 Measles virus (MV) is a highly contagious enveloped virus with a negative single-stranded RNA  
64 genome, that belongs to the family *Paramyxoviridae*, genus *Morbillivirus* (PMID: 31609197).  
65 Measles is associated with fever, cough and a characteristic maculopapular skin rash [1]. MV  
66 utilises two cellular receptors to infect its target cells: CD150 and nectin-4 [2-4]. CD150 plays  
67 a crucial role during viral entry and systemic dissemination. It is expressed on subsets of  
68 immune cells, including macrophages, dendritic cells (DCs) and lymphocytes. Nectin-4 is  
69 crucial for viral transmission to the next host. It is an adherens junction protein expressed at  
70 the basolateral surface of differentiated respiratory epithelial cells and is involved in the  
71 maintenance of epithelium integrity [5, 6].

72

73 Following entry of MV into the respiratory tract, the primary infection of myeloid cells leads  
74 to a cell-associated viremia mediated by CD150<sup>+</sup> lymphocytes, resulting in systemic disease  
75 [7-9]. During a clinically silent incubation phase of 7 to 10 days, circulating MV-infected  
76 lymphocytes migrate into various tissues and transmit the virus to susceptible tissue-resident  
77 CD150<sup>+</sup> immune cells and nectin-4<sup>+</sup> epithelial cells. Basolateral infection of respiratory  
78 epithelial cells leads to the apical release of nascent virions into the lumen of the respiratory  
79 tract [10-12]. Shedding is associated with the onset of prodromal clinical signs such as fever  
80 and cough [9, 13]. Maculopapular skin rash and conjunctivitis follow a few days later [9] and  
81 are associated with onset of MV-specific cellular immune responses [13]. Patients with a  
82 compromised cellular immune system do not develop rash or conjunctivitis, but are at high  
83 risk of developing severe disease [14].

84

85 In histopathological studies of human skin biopsies, measles skin rash is mostly characterised  
86 by infection and necrosis of keratinocytes and mononuclear cells in the epidermis, and  
87 multinucleated giant cells located in proximity to hair follicles and sebaceous glands [15, 16].  
88 It has been postulated that measles rash starts by infection of dermal endothelial cells [17].  
89 However, these cells neither express CD150 nor nectin-4 [18, 19]. Moreover, we have  
90 previously identified MV-infected lymphocytes and DCs in the skin of experimentally infected  
91 non-human primates preceding onset of skin rash [8]. Besides CD150<sup>+</sup> and nectin-4<sup>+</sup> cells,  
92 other cells that express DC-SIGN or Langerin could play a role in the pathogenesis of measles  
93 skin rash, since DC-SIGN and Langerin facilitate attachment, but not entry, of MV and thus  
94 potentially help in spreading the infection in the skin.

95

96 In order to understand the pathogenesis of measles skin rash, it is important to understand  
97 both the architecture of the skin and the spatial organisation of cell subsets that express  
98 either CD150 or nectin-4. The dermis is vascularised and contains several subsets of immune  
99 cells that express CD150. These include a network of myeloid DCs and clusters of tissue-  
100 resident CD4<sup>+</sup> and CD8<sup>+</sup> T cells [20-22]. In contrast to the dermis, the epidermis is not  
101 vascularised. It mainly consists of keratinocytes, with an interdigitating network of  
102 Langerhans cells (LCs) and melanocytes [23]. The epidermis comprises of proliferating  
103 keratinocytes at the basal lamina that differentiate towards the skin surface. Keratinocytes  
104 express nectin-4 and expression levels increase during differentiation. It is known that  
105 keratinocytes are susceptible to MV infection [24]. The top layer of the epidermis, the stratum  
106 corneum, consists of a layer of dead keratinocytes called corneocytes. Interestingly, immune  
107 cells and nutrients can only reach the epidermis by migration and diffusion, respectively, from  
108 the superficial dermis through the basal lamina. The pilosebaceous unit begins at the

109 epidermis and extends into the dermis, where the surrounding tissue is usually better  
110 vascularised. Therefore, tissue-resident lymphocytes are often seen in close association with  
111 these structures [21]. Hair follicles are mainly constituted of keratinocytes that express high  
112 levels of nectin-4 explaining their propensity for MV infection [25].

113

114 During viraemia, systemic dissemination of MV is mediated by circulating MV-infected CD150<sup>+</sup>  
115 lymphocytes. However, how these cells infiltrate the skin, ultimately resulting in skin rash,  
116 remains largely unknown. In this study we aimed to identify the cells involved in MV infection  
117 of the skin and to understand the pathogenesis of skin rash. We demonstrate that MV  
118 infection of lymphoid and myeloid cells in the superficial dermis precedes dissemination to  
119 epidermal keratinocytes, which is followed by onset of the typical skin rash.

## 120 **Results**

### 121 **MV skin infection precedes onset of rash in experimentally-infected non-human primates**

#### 122 **(NHPs)**

123 We retrospectively analysed data from cynomolgus macaques (*Macaca fascicularis*)  
124 inoculated with recombinant MV (rMV) strains expressing enhanced green fluorescent  
125 protein (EGFP) [26]. Fluorescent spots, indicating the presence of MV-infected cells, became  
126 detectable in the skin around 8 days post-inoculation (dpi), although skin rash only became  
127 prominent between 11 and 13 dpi (Fig 1) [27]. We previously reported that by 9 dpi, *i.e.* before  
128 the onset of rash, infected cells in the skin mainly consisted of EGFP<sup>+</sup> lymphocytes and DCs  
129 [8].

130

### 131 **Infection of dermal immune cells precedes infection of epidermal keratinocytes in** 132 **experimentally-infected NHPs**

133 We performed immunohistochemistry on formalin-fixed and paraffin-embedded skin  
134 samples from these NHPs and showed co-localisation of EGFP and MV nucleoprotein (N)  
135 signals in sequential skin sections, which indicated the presence of MV-infected cells. At 9 dpi,  
136 the infected cells were predominantly located in the superficial dermis, most especially  
137 around the hair follicles and sebaceous glands (Fig 2a – f). Most infection in the epidermis  
138 appeared as single-cell infection near dermal papillae and later progressed into multiple-cell  
139 infection and syncytia (Fig 2g – i) between 9 and 11 dpi. This epidermal infection later reached  
140 the superficial side at 13 dpi, by which time the infection in the dermis already had been  
141 cleared. Oedema and spongiosis could be observed at this time point.

142

143 To identify the phenotype of the infected cells, we performed dual-indirect  
144 immunofluorescence (IIF) on these sequential skin sections (Fig 3). CD45<sup>+</sup> white blood cells  
145 were present in the superficial dermis, most especially in or around blood vessels, hair follicles  
146 and sebaceous glands and, to a lesser degree, in the epidermis. Some of these CD45<sup>+</sup> white  
147 blood cells were CD3<sup>+</sup> T cells that were located in the reticular dermis, while some others  
148 were S100A8/A9-complex<sup>+</sup> (Mac387) macrophages that were abundantly present in the  
149 superficial dermis, most especially in or around the blood vessels, hair follicles or sebaceous  
150 glands. Cytokeratin<sup>+</sup> cells were restricted to the epidermis and pilosebaceous units. In  
151 contrast, CD31<sup>+</sup> endothelial cells of the blood vessels were restricted to the dermis.

152

153 MV-EGFP<sup>+</sup> cells could be found as early as 9 dpi in the dermal papillae. These cells  
154 predominantly belonged to the white blood cell phenotype (Fig 3a), which were mostly T cells  
155 or macrophages (Fig 3b – c). Some MV-infected cells were present in or surrounding blood  
156 vessels (Fig 3d). In some areas in which the infection was more progressed, the infection  
157 spread to the epidermis, even into the most superficial layers, which comprised of  
158 differentiated keratinocytes (Fig 3e). The MV-infected white blood cells were still detectable  
159 in the dermis on day 11, sometimes in close proximity with uninfected white blood cells,  
160 mostly macrophages (Fig 3f – h). These cells clustered close to the dermal papillae, where a  
161 lot of blood vessels could be found (Fig 3i). Meanwhile, the infection in the epidermis had  
162 progressed laterally and apically (Fig 3j). We also observed keratinocytes at the site of  
163 infection expressing S100A8/A9 complex (Fig 3h) as a response to inflammatory stimuli. By  
164 13 dpi, the dermis was almost clear of the infected cells and was filled with white blood cell  
165 infiltrates, mostly macrophages (Fig 3k – m). No MV-infected endothelial cells were observed



166 at this time point (Fig 3n). Infection in the epidermis had mostly resolved, although remaining  
167 infected follicular keratinocytes could still be detected (Fig 3o).

168

169 Focal MV skin infection, in which the progression of infection was different in different sites,  
170 was observed as early as 9 dpi. More infected cells were observed in the dermis and epidermis  
171 in the sites where the infection had progressed further. At the same time point, but in a  
172 different site, where the infection has not progressed, individual MV-infected cells were more  
173 often found only in the dermis. This suggested that time was not the only important factor in  
174 the pathogenesis of MV skin rash. The location in which MV-infected cells could be found and  
175 the interaction with surrounding cells could also play a crucial role in establishing infection in  
176 the skin. We observed MV-infected white blood cells in dermal papillae or close to the basal  
177 epidermis (Fig 4a). MV-infected T cells, although could often be found near the dermal  
178 papillae around 9 and 11 dpi, became scarce at 13 dpi and could only be observed in the  
179 reticular dermis. At this late time point, the MV-infected T cells were found surrounded by  
180 uninfected T cells (Fig 4b). Close interaction could also be observed among MV-infected cells  
181 with HLA-DR<sup>+</sup> antigen-presenting cells (APCs), for example through a long, EGFP<sup>+</sup> dendrite (Fig  
182 4c). We observed MV-infected cells surrounded by or in close proximity to endothelial cells  
183 (Fig 4d) at 9 dpi at the site where the infection has progressed further. Very rarely, in the  
184 same site, we found MV-infected CD31<sup>+</sup> endothelial cells near other infected cells (Fig 4e).  
185 We also observed MV-infected cells in the dermis that were negative for white blood cell, APC,  
186 endothelial cell and epithelial cell markers and appeared to be spindle- or dendritic-like cells  
187 (Fig 4f).

188

189 In the epidermis, a number of MV-infected white blood cells could be observed since 11 dpi,  
190 accompanied by infiltration of uninfected white blood cells to the site of infection (Fig 4g – i).  
191 These MV-infected white blood cells were negative for keratinocyte, macrophage and T cell  
192 markers, thus most likely to be LCs (Fig 4j – k). These cells were found in close proximity to  
193 keratinocytes, which were also positive for MV infection (Fig 4k), although keratinocyte  
194 infection could still be detected despite the absence of MV-infected white blood cells in the  
195 observed two-dimensional plane (Fig 4l).

196

197 ***Ex vivo* MV infection of human skin sheets results in higher infection levels in the dermis**  
198 **than in the epidermis**

199 Based on the observations in NHPs, we hypothesised that infection of immune cells in the  
200 dermis plays a major role in the pathogenesis of measles skin rash. To test this hypothesis,  
201 we *ex vivo* inoculated human full skin or enzymatically-separated epidermal and dermal  
202 sheets with rMV based on a wild-type virus strain Khartoum-Sudan (KS) expressing the  
203 fluorescent reporter protein Venus from an additional transcription unit in position 3 of the  
204 viral genome (rMV<sup>KS</sup>Venus(3)). We monitored the infection up to seven days. We observed  
205 that Venus<sup>+</sup> cells could be detected by inverted laser scanning microscopy as early as 2 dpi,  
206 with higher infection levels in the dermis than the epidermis (Fig 5a). The phenotype and the  
207 percentage of emigrant MV-infected cells from the skin sheet cultures were determined by  
208 flow cytometry. These cells turned out to be CD4<sup>+</sup> T cells, APCs and non-lymphocytes. In  
209 accordance to the observation on Venus<sup>+</sup> cells under the inverted laser scanning microscopy,  
210 the percentage of MV-infected cells was higher in the dermis than in the epidermis (Fig 5b).  
211 This finding suggested that the dermis is an important site where MV infection is established.

212

213 Previous studies showed that mature LCs are susceptible to MV infection and Langerin can  
214 act as an attachment receptor, but not entry receptor, for the virus [28]. To determine  
215 whether LCs play a role in MV epidermal infection as initial target cells, we performed dual-  
216 IIF stainings on human epidermal sheets from healthy donors infected with rMV<sup>KS</sup>Venus(3).  
217 We found that despite the abundant presence of LCs in the epidermal sheets, none of these  
218 were Venus-positive (S1). This finding suggests that LCs do not play a major role in the  
219 pathogenesis of measles skin rash.

220

221 **Human primary keratinocytes are susceptible to *in vitro* MV infection in a nectin-4-**  
222 **dependent manner**

223 To investigate the susceptibility and the permissiveness of keratinocytes, we inoculated  
224 human primary human keratinocytes derived from two healthy donors or from a patient  
225 affected by ectodermal dysplasia-syndactyly syndrome (EDSS1, OMIM 613573), an autosomal  
226 recessive disorder caused by mutations in the nectin-4 encoding gene *PVRL4* [25]. In this  
227 patient, EDSS is secondary to compound heterozygous mutations c.554C>T and c.906delT in  
228 the *PVRL4* gene (family B in [25]). While the first is a missense mutation (p.Thr185Met)  
229 affecting a highly conserved residue of nectin-4 located in its second extracellular  
230 immunoglobulin-like domain, the second variant leads to a prematurely truncated protein  
231 (p.Pro304HisfsX2). Previous study has shown that in cultured epidermal keratinocytes from  
232 this EDSS patient, nectin-4 mRNA displayed nearly 50% reduced expression in line with  
233 nonsense mRNA decay of the c.906delT allele, suggesting that all the residual protein  
234 expressed on the keratinocyte surface (about 10%) is represented by the p.Thr185Met  
235 mutant [25]. In agreement with previously published data, nectin-4 expression on the cell  
236 surface was highest in differentiated healthy donors' keratinocytes, as demonstrated by flow

237 cytometry. However, differentiation did not result in increase of nectin-4 expression in the  
238 EDSS patient's keratinocytes (S2) [25]. To determine whether the proliferating and  
239 differentiated keratinocytes were susceptible to MV infection, we inoculated them with two  
240 MV strains expressing fluorescent reporter proteins (rMV<sup>IC323</sup>EGFP(1) or rMV<sup>KS</sup>Venus(3)) [29]  
241 or a strain engineered to be unable to recognise nectin-4 (the 'nectin-4-blind (N4B)' strain  
242 rMV<sup>KS-N4b</sup>EGFP(3)) [10] at a multiplicity of infection (MOI) of 1. After 48 hours, we observed  
243 higher frequencies of fluorescent cells in differentiated than in the proliferating cells (Fig 6).  
244 Infection of keratinocytes with the nectin-4-blind MV resulted in low numbers of single  
245 infected cells. Few MV infected cells were detected in the EDSS proliferating and  
246 differentiated cultures.

247

248 To assess whether the infected keratinocytes also produced cell-free virus and were thus  
249 capable of spreading the infection, the supernatant of the MV-infected keratinocytes was  
250 collected and the titre of cell-free virus in the supernatant was assessed [30]. Cell-free MV  
251 was detectable in the culture supernatant of the infected proliferating and differentiated  
252 keratinocytes. In healthy donors, virus titres in supernatants of differentiated keratinocytes  
253 were higher than those in supernatant of proliferating keratinocytes. Interestingly, virus titres  
254 of the EDSS patient's proliferating keratinocytes were comparable to those of the healthy  
255 donors (Fig 7a). The difference in virus titres increased as the cells differentiated, since the  
256 titre was higher in healthy donors than in the patient.

257

258 Low expression of mutant nectin-4 on the surface of EDSS patient's keratinocytes could  
259 apparently still facilitate MV infection, leading to the production of new viral particles by  
260 infected keratinocytes, suggesting that the p.Thr185Met mutation in the second

261 immunoglobulin-like domain does not affect the virus binding. To validate this observation,  
262 we transiently transfected human embryonic kidney (HEK) 293T cells with a plasmid  
263 containing either wild-type or two mutant nectin-4 (p.Thr185Met) insert. The cells were then  
264 inoculated directly with rMV<sup>KS</sup>Venus(3) at an MOI of 3. Infection efficiency was measured by  
265 flow cytometry 24 hours post-infection. Expression levels of both wild-type and mutant  
266 nectin-4 was comparable and both nectin-4-transfected cells, but not the mock-transfected  
267 cells, proved susceptible to MV infection (Fig 7b), which confirmed that the defective nectin-  
268 4 (p.Thr185Met) could still function as a cellular receptor for MV.

269

270 Based on our findings, combined with previously published observations, we postulate a  
271 model that describes the progression of MV skin infection and the development of measles  
272 rash (Fig 8). The model takes viral tropism, location, interaction and motility of the susceptible  
273 cells, as well as the virus-specific immune responses into account. MV-infected cells enter the  
274 superficial dermis through the blood vessels and spread the infection to the tissue-resident  
275 dermal T cells, APCs and spindle- or dendritic-like cells around 7 dpi. The infection progresses  
276 several days later to the adjacent epidermal areas, where the infection is transmitted to the  
277 basal keratinocytes. As basal keratinocytes differentiate vertically to the suprabasal layers  
278 and their nectin-4 expression increases, the virus spreads laterally and the infected  
279 keratinocytes subsequently form syncytia. Infection of dermal endothelial cells was very rare,  
280 but not completely absent. We speculate that the infection is subsequently cleared around  
281 13 dpi by infiltrating MV-specific T cells, which first migrate into the dermis and later into the  
282 epidermis.

283

284 **Discussion**

285 The pathogenesis of MV skin infection and subsequent skin rash is not well understood. Here,  
286 we aimed to identify the cell types involved in MV infection of skin, and the kinetics of viral  
287 dissemination in relation to onset of rash. Based on observations from experimentally  
288 infected NHPs, *ex vivo* infected human skin explants and *in vitro* infected primary  
289 keratinocytes, we initially observed MV-infected perivascular, perifollicular and periadnexal  
290 dermal immune cells, followed by dissemination to epidermal keratinocytes. Skin infection  
291 preceded onset of rash by 3 to 4 days.

292

293 The dermis contains several potential target cells for MV infection. Due to the blood vessels  
294 and capillaries that run through it, the dermis is filled with CD150<sup>+</sup> lymphoid and myeloid cells  
295 that traffic through or reside in the tissue. CD4<sup>+</sup> and CD8<sup>+</sup> T cells localise and move differently  
296 in the skin [31]. Slow-moving CD8<sup>+</sup> resident memory T cells (T<sub>RM</sub>) reside in the epidermis and  
297 hair follicles, while highly motile CD4<sup>+</sup> effector memory T cells (T<sub>EM</sub>) migrate into the dermis  
298 and recirculate systemically [32]. We detected MV-infected T cells in the dermis from 9 dpi  
299 onward, but never in the epidermis at that time point. Previous studies have shown that CD4<sup>+</sup>  
300 T<sub>EM</sub> cells are highly susceptible to MV infection [26, 33]. Interaction of MV-infected T cells  
301 with skin-resident APCs may result in further cutaneous spread. T cells have been described  
302 in human skin to cluster with APCs around appendages, such as hair follicles [34-36]. We did  
303 not observe such T cell clusters in NHPs, most likely due to T cell depletion that occurs  
304 systemically and peaks around 9 dpi [26]. Whether this depletion leads to the loss of pre-  
305 existing skin-resident memory T cells remains to be studied. Additionally, we and others have  
306 observed MV-infected T cells and APCs around hair follicles and sebaceous glands [15, 37],  
307 which are surrounded by nectin-4<sup>+</sup> epithelial cells [25]. The close proximity of these infected

308 cells to the basal keratinocytes may lead to the spread of MV infection from the dermis to  
309 epidermis.

310

311 The epidermis consists predominantly of keratinocytes, which express nectin-4 and are  
312 susceptible to MV infection [24]. We were not able to determine the expression of nectin-4  
313 in the NHP epidermis due to the lack of cross-reactive antibodies. However, in accordance  
314 with the previous study, we show primary human keratinocytes express nectin-4 and its  
315 expression is upregulated upon differentiation [25]. We show here that nectin-4 expression  
316 plays a role in the susceptibility of keratinocytes to *in vitro* MV infection: higher expression of  
317 nectin-4 resulted in higher susceptibility. This led to the question whether the keratinocytes  
318 of an EDSS patient, which have strongly reduced expression of nectin-4, were susceptible to  
319 MV infection. We found that, despite its very low expression, the nectin-4 mutant could still  
320 facilitate MV infection *in vitro*. Residual nectin-4 activity in this EDSS patient therefore still  
321 allows binding of MV haemagglutinin protein and hence facilitates viral entry. Notably, the  
322 missense mutation p.Thr185Met is located in the second immunoglobulin-like domain, while  
323 MV-binding interfaces of nectin-4 are located in three loops of its most external domain.

324

325 Another cell type of interest in the epidermis is the LC, a subset of DCs. Although we could  
326 not observe MV-infected LCs in our human skin *ex vivo* model, LCs are known to be  
327 susceptible to MV infection [38-40]. The activation status of the cells also determines their  
328 susceptibility, since immature LCs are not susceptible to MV infection, while mature ones are  
329 [28]. This offers an explanation to why the LCs were not susceptible to MV infection in our *ex*  
330 *vivo* model: the cells might still have been in their immature state. We were also not able to  
331 identify LCs in cynomolgus macaque skin tissues due to the unavailability of cross-reactive

332 antibodies. The susceptibility of LCs to MV infection *in vivo* and their role in the pathogenesis  
333 of measles skin rash remain to be determined. Additionally, LCs express Langerin that can act  
334 as an attachment, but not entry, receptor to MV [28] and thus can indirectly introduce MV  
335 infection to the epidermal keratinocytes by acting as an attachment hub for the virus from  
336 the dermis. Although we were able to clearly identify APCs and T cells in the dermis, we were  
337 not able to find HLA-DR<sup>+</sup> or CD3<sup>+</sup> cells in the epidermis. The involvement of these cells in the  
338 pathogenesis of MV infection in the epidermis remains to be elicited.

339

340 DCs and macrophages occupy the dermis as professional APCs and phagocytes, respectively.  
341 Macrophages are present in high numbers and are associated with blood or lymphatic vessels,  
342 while dermal DCs have been found to form clusters with T cells, suggesting the presence of  
343 an inducible structure of macrophages, DCs and T cells that may function as a skin-associated  
344 lymphoid tissue [41, 42]. In the respiratory tract, DCs and macrophages act as Trojan horses  
345 during MV infection by spreading the virus to the lymphocytes in draining lymph nodes [7,  
346 43-46]. Migrating or patrolling MV-infected DCs and macrophages may play the same role in  
347 the skin as they do in the respiratory tract. However, these cells may also play a crucial role  
348 as innate immune cells that inhibit infection. Close communication of MV-infected DCs and  
349 macrophages with T cells can lead to activation of MV-specific immune responses and  
350 subsequently to the development of rash. The role of these immune responses in the  
351 development of rash has been highlighted in immunocompromised patients with MV  
352 infection that do not develop skin rash [14].

353

354 Blood vessels and capillaries run through the dermis. The capillaries penetrate into the dermal  
355 papillae, from where the distance to the epidermis is minimal, and the distribution of the



356 capillary loops differs according to the type of the skin. The capillary bed consists of an  
357 arteriole, which gives rise to metarterioles and subsequently hundreds of capillaries. The  
358 capillaries provide the dermis and epidermis with nutrition and oxygen, and connect to  
359 venous capillaries and further to a venule. Inflammation due to infection may cause  
360 prolonged vasodilatation and increased capillary permeability. This hyperaemic reaction  
361 allows the release of chemokines by skin-resident cells, such as memory immune cells and  
362 keratinocytes, that leads to the infiltration of various immune cells, such as macrophages and  
363 lymphocytes. The vasodilatation also causes erythema and oedema [47]. Given that measles  
364 rash is described as maculopapular (*i.e.* small with raised bumps) and erythematous (*i.e.* red),  
365 and oedema can be observed in MV-infected skin [15], we speculate that hyperaemia is  
366 responsible for the appearance of the erythematous maculopapular rash. Although  
367 theoretically it is possible to investigate the presence of hyperaemia in our *in vivo* model by  
368 showing an increased number of erythrocytes in the cutaneous blood vessels, we could not  
369 perform the calculation fairly, since the animals were sacrificed by exsanguination.

370

371 MV infection in the skin gives a unique appearance of rash compared to other viral  
372 exanthemata. Rubella rash, for example, has been described as macroscopically similar to  
373 measles rash, since it gives a pink-reddish “rubelliform” maculopapular rash. However, in  
374 rubella, viral infection takes place deeper in the dermis, in contrast to measles skin infection  
375 that occurs more superficially in the dermis. Infection of the keratinocytes, which is typical  
376 for measles rash, does not occur during rubella virus infection [48]. In contrast, varicella zoster  
377 virus (VZV), as a representative of the *Herpesviridae* family member, has similar target cells  
378 in the dermis and epidermis as MV, but displays a different type of rash. VZV infects  
379 perivascular macrophages and DCs as well as keratinocytes, but the infection leads to the

380 appearance of spots that turn into itchy blisters [49]. Arboviral exanthemata, on the other  
381 hand, have a different route of infection, but often present overlapping outcomes in the skin.  
382 Dengue virus is introduced into the body through a mosquito bite and injected into the  
383 bloodstream, with spillover to the epidermis and the dermis. This spillover causes infection  
384 of LCs and keratinocytes. Dengue virus spreads systemically through the infection of  
385 monocytes and macrophages. The virus also causes vascular leakage through infection of  
386 endothelial cells, leading to the appearance of minor haemorrhagic lesions [50]. Although  
387 petechial rash is one of the clinical manifestations of dengue virus infection, morbilliform rash  
388 is also often described during classical dengue fever [51]. Altogether, these findings, including  
389 ours, strongly suggest that the appearance of rash, especially during measles, is closely linked  
390 to the viral tropism, the availability and location of susceptible target cells and the subsequent  
391 immune responses to clear the infection.

392

393 MV infects the respiratory epithelial cells and is shed apically into the mucus lining the lumen  
394 of the upper and lower respiratory tract, which is void of CD150 or nectin-4. The virus is thus  
395 transported to the throat by the mucociliary escalator and expelled into the air by coughing  
396 [52]. The role of MV skin infection in viral transmission is still a subject of speculation. The  
397 outer layer of the epidermis consists of dead keratinised cells. Whether these dead cells allow  
398 the attachment of MV and hence the release of dead-cell-associated virus particles into the  
399 air remains to be investigated [15].

400

401 In conclusion, our study offers a new explanation to the pathogenesis of measles skin rash:  
402 MV-infected lymphocytes and myeloid cells enter the dermis, where the infection spreads to  
403 the susceptible cells in the vicinity of dermal papillae, hair follicles, sebaceous glands and

404 blood vessels in the superficial dermis. The infection spreads laterally and apically to the  
405 epidermis in a nectin-4-dependent manner. The infection is cleared several days later by  
406 infiltrating MV-specific T cells, accompanied by the appearance of oedema and hyperaemia  
407 that give the appearance of an erythematous morbilliform rash.

## 408 **Materials and Methods**

### 409 **Ethical statement**

410 All NHP samples were derived from previously published studies, and no new experimental  
411 infections were performed [26]. Studies involving the use of primary keratinocytes were  
412 approved by the local ethics committee, and written informed consent was obtained from  
413 both the EDSS1 patient and the healthy volunteers [25]. Studies using human skin tissue were  
414 performed in accordance with the Amsterdam University Medical Centres (AUMC)  
415 institutional guidelines with approval of the Medical Ethics Review Committee of the AUMC,  
416 location Academic Medical Centre, Amsterdam, the Netherlands, reference number:  
417 W15\_089 # 15.0103. All samples were handled anonymously.

418

### 419 **Cells**

420 Culture of normal and EDSS primary human keratinocytes was carried out as previously  
421 described [25]. Keratinocytes were cultured till sub-confluence in serum-free Keratinocyte  
422 Growth Medium (KGM, Invitrogen) containing 0.15 mM Ca<sup>2+</sup> (proliferating keratinocytes), and  
423 then induced to differentiate by culturing for further 3 days in a 3:1 mixture of DMEM and  
424 Ham's F12 media (Invitrogen, Palo Alto, CA) containing FCS (10%), insulin (5 µg/ml),  
425 transferrin (5 µg/ml), adenine (0.18 mM), hydrocortisone (0.4 µg/ml), cholera toxin (0.1 nM),  
426 triiodothyronine (2 nM), EGF (10 ng/ml), glutamine (4 mM), and penicillin-streptomycin (50  
427 IU/ml) (differentiated keratinocytes). Epstein-Barr virus- (EBV-) transformed B-  
428 lymphoblastoma cell line (BLCL) and human broncho-alveolar carcinoma (NCI-H358) cell lines  
429 were grown in RPMI-1640 medium supplemented with 10% of fetal bovine serum (FBS), 100  
430 IU of penicillin/ml, 100 µg of streptomycin/ml and 2 mM glutamine (R10F medium). Vero cells  
431 expressing human CD150 (Vero-CD150) were grown in Dulbecco's modified Eagle medium

432 (DMEM) supplemented with 10% of FBS, 100 IU of penicillin/ml, 100 µg of streptomycin/ml  
433 and 2 mM glutamine (D10F medium) [53]. Human embryonic kidney (HEK) 293T cells were  
434 grown in D10F medium supplemented with 1 mM sodium pyruvate and non-essentials amino  
435 acids. All cells were cultured in a humidified incubator at 37° C with 5% of CO<sub>2</sub>.

436

#### 437 **Tissues**

438 Residual skin materials were obtained from six different adult human donors undergoing  
439 correctional surgery and stored at 4° C overnight. The skin was shaved using a dermatome  
440 (0.3 mm, Zimmer Biomet, UK). For the preparation of full skin sheets, which consist of dermis  
441 and epidermis, the shaved skin was cut into circular sheets (diameter approximately 1 cm)  
442 using a skin biopsy punch and cultured in IMDM supplemented with 10% of FCS, 100 IU of  
443 penicillin/ml, 100 µg of streptomycin/ml (Invitrogen), 2 mM glutamine and 20 µg/ml  
444 gentamicine (Centrafarm, Netherlands) (I10F medium), with the epidermis facing upward.  
445 The full skin pieces were stored in a 24-well plate in I10F medium. For the preparation of  
446 epidermal sheets, shaved skin was incubated in I10F medium in the presence of 1 U/ml of  
447 dispase (Roche Diagnostics) for 1 h at 37° C or 0.5 U/ml overnight at 4° C. The epidermis was  
448 separated from dermis using a pair of forceps and cut into circular sheets using a skin biopsy  
449 punch. The epidermal or dermal sheets were stored in a 24-well plate in I10F medium, with  
450 the keratin layer of the epidermis facing upward.

451

#### 452 **Viruses**

453 All recombinant MV strains used in this study were described previously: recombinant MV  
454 strain Khartoum-Sudan (KS) expressing the fluorescent protein Venus from an additional  
455 transcription unit in position 1 or 3 (rMV<sup>KS</sup>Venus(1) or (3)) [54] and strain IC323 expressing

456 the fluorescent protein EGFP in position 1 (rMV<sup>IC323</sup>EGFP(1)) of the viral genome [29] were  
457 based on wild type viruses. An rMV<sup>KS</sup> expressing EGFP in position 3 of the viral genome  
458 engineered to be unable to recognise nectin-4 (referred to as the 'nectin-4-blind (N4b)' rMV<sup>KS-</sup>  
459 <sup>N4b</sup>EGFP(3)) was also included in this study [55]. Virus titres were determined by endpoint  
460 titration on Vero-CD150 cells, and were expressed as 50% tissue culture infectious dose  
461 (TCID<sub>50</sub>) per ml calculated as described by Reed and Muench [30].

462

### 463 **Sequencing**

464 Partial sequences of plasmid 3XFLAG containing wild-type or mutant nectin-4 (p. Thr185Met)  
465 insert were obtained with Applied Biosystems 3130xl Genetic Analyser, according to the  
466 instructions provided by the manufacturer. The primers used in this assay were: 5'- CCT-GCC-  
467 CTC-ACT-GAA-TCC-TG-3' and 5'-ACA-CCC-ACC-ACC-ACC-ACC-GA-3'. The obtained sequences  
468 were analysed with BioEdit software.

469

### 470 **Transfection**

471 De Wit *et al.* have previously described transfection of HEK 293T cells [56]. In brief, prior to  
472 transfection, HEK 293T cells ( $3 \times 10^6$ ) were seeded into gelatinised 10-cm<sup>2</sup> culture dishes. The  
473 cells were transiently transfected overnight in the presence of CaCl<sub>2</sub> with 3XFLAG plasmid (30  
474 µg) containing wild-type or mutant nectin-4 insert. After 6 h of transfection, the cells were  
475 treated with trypsin and seeded into gelatinised 24-well plates. After 36 h of transfection, the  
476 cells were treated with trypsin and the nectin-4 expression levels were assessed with flow  
477 cytometry.

478

### 479 ***In vitro* MV infection**

480 Adherent primary keratinocytes were either inoculated directly or were treated with trypsin-  
481 EDTA (0.05%) and inoculated in suspension with the three different rMV strains at an MOI of  
482 1. After 2 h, the suspension cells were washed to remove unbound virus and seeded onto 24-  
483 well plates in K medium. After 48 h of infection, the cells were observed under an inverted-  
484 laser scanning LSM-700 microscope (Zeiss) and the infection percentages were assessed by  
485 flow cytometry. Transiently transfected HEK 293T cells were inoculated directly with  
486 rMV<sup>KS</sup>Venus(3) at an MOI of 3. After 24 h of infection, the infection percentages were  
487 measured by flow cytometry.

488

#### 489 ***Ex vivo MV infection***

490 Full skin pieces, dermal or epidermal sheets were inoculated with cell-free rMV<sup>KS</sup>Venus(3).  
491 Briefly, 200 µl of pure virus stock ( $3.7 \times 10^6$  TCID<sub>50</sub>/ml) was added to each well of a 24-well  
492 plate, and the skin sheets were added on top of the liquid with the epidermis facing upwards.  
493 While full skin and epidermal sheets remained afloat, dermal sheets tended to sink and both  
494 apical and basolateral surfaces were exposed to virus. After 2 h at 37°C, I10F medium was  
495 added to the wells. The progression of infection was observed at 2, 4 and 7 dpi under the  
496 inverted laser scanning microscope. Full skin pieces, dermal or epidermal sheets were fixed  
497 in 4% paraformaldehyde (PFA) for at least 24 h and subsequently stored in PBS or as formalin-  
498 fixed paraffin-embedded tissue blocks.

499

#### 500 **Measurement of MV production by infected keratinocytes**

501 Supernatant of MV-infected keratinocytes was titrated into 96-well plates containing Vero-  
502 CD150 cells ( $1 \times 10^4$  cells/well). The titre of the virus was expressed as TCID<sub>50</sub>/ml and  
503 calculated as described above.

504

## 505 **Flow cytometry**

506 Flow cytometry was performed using a BD FACSCanto II. Primary keratinocytes or HEK 293T  
507 cells were labelled with nectin-4<sup>PE</sup> antibody (clone 337516; R&D Systems) to assess the  
508 expression of nectin-4. Isotype control (Isotype<sup>PE</sup>, clone 27-35, BD Biosciences) antibody was  
509 included to assess the level of background staining. NCI-H358 cells and BLCL were included as  
510 positive and negative controls for nectin-4 expression, respectively. All cells were fixed with  
511 2% of PFA prior to measurement of the percentage of cells expressing the virus-encoded  
512 fluorescent protein. Mock-infected cells were included as infection control. Supernatants  
513 from full skin pieces (n = 3 donors), dermal (n = 1 donor) or epidermal sheets (n = 3 donors)  
514 were isolated at 2, 4 and 7 dpi and emigrant cells were isolated after undergoing  
515 centrifugation. Antibodies used in this experiment is listed in Table 1. Data was acquired with  
516 BD FACSDiva software and analysed with FlowJo software.

517

518 **Table 1.** List of antibodies used in flow cytometry to identify the phenotypes of cells in full  
519 skin, dermal and epidermal sheets.

| Antigen | Clone  | Fluorochrome |
|---------|--------|--------------|
| CD4     | SK3    | PerCP        |
| CD19    | J3-119 | PE-Cy7       |
| CD3     | UCHT1  | APC          |
| HLA-DR  | L243   | Pacific Blue |
| CD8     | SK1    | AmCyan       |

520

## 521 ***In situ* analyses**



522 Immunohistochemistry was performed using monoclonal antibodies directed to MV N  
523 protein (clone 83KKII, Chemicon [57]) or rabbit polyclonal antibody directed to GFP  
524 (Invitrogen). Goat anti-mouse IgG1 or goat anti-rabbit antibody conjugated with biotin was  
525 included as secondary antibody. Streptavidin-horseradish peroxidase was added for signal  
526 detection. Dual-IF assays were performed using mouse monoclonal antibodies directed to  
527 CD45 (clone 2B11+PD7/26; DAKO), CD3 (clone F7.2.38; DAKO), CD31 (clone JC70A; DAKO),  
528 cytokeratin (clone AE1/AE3; DAKO), S100A8/A9 complex (clone MAC387; Abcam), or HLA-DR  
529 (clone L243; BioLegend) in combination with rabbit polyclonal antibody directed to GFP. Goat  
530 anti-rabbit-IgG-Alexa Fluor (AF)488 (Invitrogen) and goat anti-mouse IgG-AF594 (Invitrogen)  
531 were included as secondary antibodies. Formalin-fixed, paraffin-embedded tissues were  
532 sectioned at 3  $\mu$ m, deparaffinised and rehydrated prior to antigen retrieval. Antigen retrieval  
533 for MV N protein staining was performed in the presence of 0.1% protease in pre-warmed  
534 phosphate buffered saline (PBS) for 10 minutes at 37° C. Antigen retrieval for other stainings  
535 was performed in citrate buffer (10 mM, pH = 6.0) with heat induction. Sections were  
536 incubated with primary antibody overnight at 4° C before incubation with secondary and  
537 tertiary antibodies. For IF assays, the slides were mounted with ProLong Diamond Antifade  
538 Mountant with DAPI (Thermo Fisher Scientific) prior to fluorescence detection with the  
539 inverted laser scanning microscope.

540

## 541 **Funding**

542 BMN and TBHG were supported by Aidsfonds (P-11118), European Research Council,  
543 Advanced grant (670424). BML is supported by the Indonesian Endowment Fund for  
544 Education (grant no. 20150822023688). The funders had no role in study design, data  
545 collection and analysis, decision to publish, or preparation of the manuscript.

546

547 **Acknowledgment**

548 We are grateful to the Boerhaave Medical Centre (Amsterdam, the Netherlands) and A.

549 Knottenbelt (Flevo Clinic Almere, the Netherlands) for the provision of human skin tissues,

550 Peter R. W. A. van Run and Daryl Geers for the excellent technical assistance.

551

## 552 Reference list

- 553 1. Rota PA, Moss WJ, Takeda M, de Swart RL, Thompson KM, Goodson JL. Measles. Nat  
554 Rev Dis Primers. 2016;2:16049. doi: 10.1038/nrdp.2016.49. PubMed PMID: 27411684.
- 555 2. Tatsuo H, Ono N, Tanaka K, Yanagi Y. SLAM (CDw150) is a cellular receptor for measles  
556 virus. Nature. 2000;406(6798):893-7. doi: 10.1038/35022579. PubMed PMID: 10972291.
- 557 3. Muhlebach MD, Mateo M, Sinn PL, Prufer S, Uhlig KM, Leonard VH, et al. Adherens  
558 junction protein nectin-4 is the epithelial receptor for measles virus. Nature.  
559 2011;480(7378):530-3. doi: 10.1038/nature10639. PubMed PMID: 22048310.
- 560 4. Noyce RS, Richardson CD. Nectin 4 is the epithelial cell receptor for measles virus.  
561 Trends Microbiol. 2012;20(9):429-39. doi: 10.1016/j.tim.2012.05.006. PubMed PMID:  
562 22721863.
- 563 5. Mateo M, Generous A, Sinn PL, Cattaneo R. Connections matter--how viruses use cell-  
564 cell adhesion components. J Cell Sci. 2015;128(3):431-9. doi: 10.1242/jcs.159400. PubMed  
565 PMID: 26046138.
- 566 6. Cifuentes-Munoz N, Dutch RE, Cattaneo R. Direct cell-to-cell transmission of  
567 respiratory viruses: The fast lanes. PLoS Pathog. 2018;14(6):e1007015. doi:  
568 10.1371/journal.ppat.1007015. PubMed PMID: 29953542.
- 569 7. Lemon K, de Vries RD, Mesman AW, McQuaid S, van Amerongen G, Yuksel S, et al.  
570 Early target cells of measles virus after aerosol infection of non-human primates. PLoS Pathog.  
571 2011;7(1):e1001263. doi: 10.1371/journal.ppat.1001263. PubMed PMID: 21304593.
- 572 8. de Swart RL, Ludlow M, de Witte L, Yanagi Y, van Amerongen G, McQuaid S, et al.  
573 Predominant infection of CD150+ lymphocytes and dendritic cells during measles virus  
574 infection of macaques. PLoS Pathog. 2007;3(11):e178. doi: 10.1371/journal.ppat.0030178.  
575 PubMed PMID: 18020706.

- 576 9. Laksono BM, de Vries RD, Verburgh RJ, Visser EG, de Jong A, Fraaij PLA, et al. Studies  
577 into the mechanism of measles-associated immune suppression during a measles outbreak in  
578 the Netherlands. *Nat Commun.* 2018;9(1):4944. doi: 10.1038/s41467-018-07515-0. PubMed  
579 PMID: 30470742.
- 580 10. Ludlow M, Lemon K, de Vries RD, McQuaid S, Millar EL, van Amerongen G, et al.  
581 Measles virus infection of epithelial cells in the macaque upper respiratory tract is mediated  
582 by subepithelial immune cells. *J Virol.* 2013;87(7):4033-42. doi: 10.1128/jvi.03258-12.  
583 PubMed PMID: 23365435.
- 584 11. Sawatsky B, Cattaneo R, von Messling V. Canine Distemper Virus Spread and  
585 Transmission to Naive Ferrets: Selective Pressure on SLAM-Dependent Entry. *J Virol.*  
586 2018;92(15):e00669-18. doi: JVI.00669-18 [pii]  
587 10.1128/JVI.00669-18. PubMed PMID: 29793948.
- 588 12. Racaniello V. *Virology.* An exit strategy for measles virus. *Science.*  
589 2011;334(6063):1650-1. doi: 10.1126/science.1217378. PubMed PMID: 22194562.
- 590 13. Rota PA, Moss WJ, Takeda M, de Swart RL, Thompson KM, Goodson JL. Measles. *Nat*  
591 *Rev Dis Primers.* 2016;2(1):16049. doi: 10.1038/nrdp.2016.49. PubMed PMID: 27411684.
- 592 14. de Swart RL, Wertheim-van Dillen PM, van Binnendijk RS, Muller CP, Frenkel J,  
593 Osterhaus AD. Measles in a Dutch hospital introduced by an immuno-compromised infant  
594 from Indonesia infected with a new virus genotype. *Lancet.* 2000;355(9199):201-2. PubMed  
595 PMID: 10675124.
- 596 15. Liersch J, Omaj R, Schaller J. Histopathological and Immunohistochemical  
597 Characteristics of Measles Exanthema: A Study of a Series of 13 Adult Cases and Review of  
598 the Literature. *Am J Dermatopathol.* 2019. doi: 10.1097/DAD.0000000000001431. PubMed  
599 PMID: 31021834.

- 600 16. Magdaleno-Tapial J, Valenzuela-Onate C, Giacaman-von der Weth M, Ferrer-Guillen  
601 B, Garcia-Legaz Martinez M, Martinez-Domenech A, et al. Follicle and Sebaceous Gland  
602 Multinucleated Cells in Measles. *Am J Dermatopathol*. 2019;41(4):289-92. doi:  
603 10.1097/DAD.0000000000001278. PubMed PMID: 30252698.
- 604 17. Kimura A, Tosaka K, Nakao T. An immunofluorescent and electron microscopic study  
605 of measles skin eruptions. *Tohoku J Exp Med*. 1975;117(3):245-56. PubMed PMID: 1105894.
- 606 18. Andres O, Obojes K, Kim KS, ter Meulen V, Schneider-Schaulies J. CD46- and CD150-  
607 independent endothelial cell infection with wild-type measles viruses. *J Gen Virol*. 2003;84(Pt  
608 5):1189-97. doi: 10.1099/vir.0.18877-0. PubMed PMID: 12692284.
- 609 19. Reymond N, Fabre S, Lecocq E, Adelaide J, Dubreuil P, Lopez M. Nectin4/PRR4, a new  
610 afadin-associated member of the nectin family that trans-interacts with nectin1/PRR1  
611 through V domain interaction. *J Biol Chem*. 2001;276(46):43205-15. doi:  
612 10.1074/jbc.M103810200. PubMed PMID: 11544254.
- 613 20. Nomura T, Kabashima K, Miyachi Y. The panoply of alphabetaT cells in the skin. *J*  
614 *Dermatol Sci*. 2014;76(1):3-9. doi: S0923-1811(14)00183-2 [pii]  
615 10.1016/j.jdermsci.2014.07.010. PubMed PMID: 25190363.
- 616 21. Adachi T, Kobayashi T, Sugihara E, Yamada T, Ikuta K, Pittaluga S, et al. Hair follicle-  
617 derived IL-7 and IL-15 mediate skin-resident memory T cell homeostasis and lymphoma. *Nat*  
618 *Med*. 2015;21(11):1272-9. doi: 10.1038/nm.3962. PubMed PMID: 26479922.
- 619 22. Watanabe R, Gehad A, Yang C, Scott LL, Teague JE, Schlapbach C, et al. Human skin is  
620 protected by four functionally and phenotypically discrete populations of resident and  
621 recirculating memory T cells. *Sci Transl Med*. 2015;7(279):279ra39. doi: 7/279/279ra39 [pii]  
622 10.1126/scitranslmed.3010302. PubMed PMID: 25787765.

- 623 23. Romani N, Holzmann S, Tripp CH, Koch F, Stoitzner P. Langerhans cells - dendritic cells  
624 of the epidermis. *APMIS*. 2003;111(7-8):725-40. doi: DOI 10.1034/j.1600-  
625 0463.2003.11107805.x. PubMed PMID: 12974775.
- 626 24. Gourru-Lesimple G, Mathieu C, Thevenet T, Guillaume-Vasselin V, Jegou JF, Boer CG,  
627 et al. Measles virus infection of human keratinocytes: Possible link between measles and  
628 atopic dermatitis. *J Dermatol Sci*. 2017;86(2):97-105. doi: 10.1016/j.jdermsci.2017.01.015.  
629 PubMed PMID: 28233587.
- 630 25. Brancati F, Fortugno P, Bottillo I, Lopez M, Josselin E, Boudghene-Stambouli O, et al.  
631 Mutations in PVRL4, encoding cell adhesion molecule nectin-4, cause ectodermal dysplasia-  
632 syndactyly syndrome. *Am J Hum Genet*. 2010;87(2):265-73. doi: 10.1016/j.ajhg.2010.07.003.  
633 PubMed PMID: 20691405.
- 634 26. de Vries RD, McQuaid S, van Amerongen G, Yuksel S, Verburgh RJ, Osterhaus AD, et al.  
635 Measles immune suppression: lessons from the macaque model. *PLoS Pathog*.  
636 2012;8(8):e1002885. doi: 10.1371/journal.ppat.1002885. PubMed PMID: 22952446.
- 637 27. de Vries RD, Lemon K, Ludlow M, McQuaid S, Yuksel S, van Amerongen G, et al. *In vivo*  
638 tropism of attenuated and pathogenic measles virus expressing green fluorescent protein in  
639 macaques. *J Virol*. 2010;84(9):4714-24. doi: 10.1128/JVI.02633-09. PubMed PMID: 20181691.
- 640 28. van der Vlist M, de Witte L, de Vries RD, Litjens M, de Jong MA, Fluitsma D, et al.  
641 Human Langerhans cells capture measles virus through Langerin and present viral antigens to  
642 CD4(+) T cells but are incapable of cross-presentation. *Eur J Immunol*. 2011;41(9):2619-31.  
643 doi: 10.1002/eji.201041305. PubMed PMID: 21739428.
- 644 29. Hashimoto K, Ono N, Tatsuo H, Minagawa H, Takeda M, Takeuchi K, et al. SLAM  
645 (CD150)-independent measles virus entry as revealed by recombinant virus expressing green  
646 fluorescent protein. *J Virol*. 2002;76(13):6743-9. PubMed PMID: 12050387.

- 647 30. Reed LJ, Muench H. A simple method of estimating fifty percent end points. The  
648 American Journal of Hygiene. 1938;27(3):493-7.
- 649 31. Gebhardt T, Whitney PG, Zaid A, Mackay LK, Brooks AG, Heath WR, et al. Different  
650 patterns of peripheral migration by memory CD4+ and CD8+ T cells. Nature.  
651 2011;477(7363):216-9. doi: 10.1038/nature10339. PubMed PMID: 21841802.
- 652 32. Mueller SN, Gebhardt T, Carbone FR, Heath WR. Memory T cell subsets, migration  
653 patterns, and tissue residence. Annu Rev Immunol. 2013;31:137-61. doi: 10.1146/annurev-  
654 immunol-032712-095954. PubMed PMID: 23215646.
- 655 33. Laksono BM, Grosserichter-Wagener C, de Vries RD, Langeveld SAG, Brem MD, van  
656 Dongen JJM, et al. In Vitro Measles Virus Infection of Human Lymphocyte Subsets  
657 Demonstrates High Susceptibility and Permissiveness of both Naive and Memory B Cells. J  
658 Virol. 2018;92(8). doi: 10.1128/jvi.00131-18. PubMed PMID: 29437964.
- 659 34. Bos JD, Zonneveld I, Das PK, Krieg SR, van der Loos CM, Kapsenberg ML. The skin  
660 immune system (SIS): distribution and immunophenotype of lymphocyte subpopulations in  
661 normal human skin. J Invest Dermatol. 1987;88(5):569-73. doi: 10.1111/1523-  
662 1747.ep12470172. PubMed PMID: 3494791.
- 663 35. Clark RA, Chong B, Mirchandani N, Brinster NK, Yamanaka K, Dowgiert RK, et al. The  
664 vast majority of CLA+ T cells are resident in normal skin. J Immunol. 2006;176(7):4431-9. doi:  
665 10.4049/jimmunol.176.7.4431. PubMed PMID: 16547281.
- 666 36. Collins N, Jiang X, Zaid A, Macleod BL, Li J, Park CO, et al. Skin CD4(+) memory T cells  
667 exhibit combined cluster-mediated retention and equilibration with the circulation. Nat  
668 Commun. 2016;7:11514. doi: 10.1038/ncomms11514. PubMed PMID: 27160938.

- 669 37. Tirado M, Adamzik K, Boer-Auer A. Follicular necrotic keratinocytes - a helpful clue to  
670 the diagnosis of measles. *J Cutan Pathol*. 2015;42(9):632-8. doi: 10.1111/cup.12529. PubMed  
671 PMID: 25965994.
- 672 38. Steineur MP, Grosjean I, Bella C, Kaiserlian D. Langerhans cells are susceptible to  
673 measles virus infection and actively suppress T cell proliferation. *Eur J Dermatol*.  
674 1998;8(6):413-20. PubMed PMID: 9729058.
- 675 39. Watari E, Shimizu M, Takahashi H. Langerhans cells stimulated by mechanical stress  
676 are susceptible to measles virus infection. *Intervirology*. 2005;48(2-3):145-52. doi:  
677 10.1159/000081742. PubMed PMID: 15812188.
- 678 40. van der Vlist M, de Witte L, de Vries RD, Litjens M, de Jong MA, Fluitsma D, et al.  
679 Human Langerhans cells capture measles virus through Langerin and present viral antigens to  
680 CD4+ T cells but are incapable of cross-presentation. *Eur J Immunol*. 2011;41(9):2619-31. doi:  
681 10.1002/eji.201041305. PubMed PMID: 21739428.
- 682 41. Ono S, Kabashima K. Novel insights into the role of immune cells in skin and inducible  
683 skin-associated lymphoid tissue (iSALT). *Allergo J Int*. 2015;24:170-9. doi: 10.1007/s40629-  
684 015-0065-1. PubMed PMID: 27069837.
- 685 42. McLellan AD, Heiser A, Sorg RV, Fearnley DB, Hart DN. Dermal dendritic cells  
686 associated with T lymphocytes in normal human skin display an activated phenotype. *J Invest*  
687 *Dermatol*. 1998;111(5):841-9. doi: 10.1046/j.1523-1747.1998.00375.x. PubMed PMID:  
688 9804348.
- 689 43. de Witte L, Abt M, Schneider-Schaulies S, van Kooyk Y, Geijtenbeek TB. Measles virus  
690 targets DC-SIGN to enhance dendritic cell infection. *J Virol*. 2006;80(7):3477-86. doi:  
691 10.1128/JVI.80.7.3477-3486.2006. PubMed PMID: 16537615.



- 692 44. de Witte L, de Vries RD, van der Vlist M, Yuksel S, Litjens M, de Swart RL, et al. DC-  
693 SIGN and CD150 have distinct roles in transmission of measles virus from dendritic cells to T-  
694 lymphocytes. *PLoS Pathog.* 2008;4(4):e1000049. doi: 10.1371/journal.ppat.1000049.  
695 PubMed PMID: 18421379.
- 696 45. Avota E, Gulbins E, Schneider-Schaulies S. DC-SIGN mediated sphingomyelinase-  
697 activation and ceramide generation is essential for enhancement of viral uptake in dendritic  
698 cells. *PLoS Pathog.* 2011;7(2):e1001290. doi: 10.1371/journal.ppat.1001290. PubMed PMID:  
699 21379338.
- 700 46. Mesman AW, de Vries RD, McQuaid S, Duprex WP, de Swart RL, Geijtenbeek TB. A  
701 prominent role for DC-SIGN+ dendritic cells in initiation and dissemination of measles virus  
702 infection in non-human primates. *PLoS One.* 2012;7(12):e49573. doi:  
703 10.1371/journal.pone.0049573. PubMed PMID: 23227146.
- 704 47. Bliss MR. Hyperaemia. *J Tissue Viability.* 1998;8(4):4-13. PubMed PMID: 10480965.
- 705 48. Takahashi H, Umino Y, Sato TA, Kohama T, Ikeda Y, Iijima M, et al. Detection and  
706 comparison of viral antigens in measles and rubella rashes. *Clin Infect Dis.* 1996;22(1):36-9.  
707 PubMed PMID: 8824963.
- 708 49. Ouwendijk WJ, Mahalingam R, de Swart RL, Haagmans BL, van Amerongen G, Getu S,  
709 et al. T-Cell tropism of simian varicella virus during primary infection. *PLoS Pathog.*  
710 2013;9(5):e1003368. doi: 10.1371/journal.ppat.1003368. PubMed PMID: 23675304.
- 711 50. Martina BE, Koraka P, Osterhaus AD. Dengue virus pathogenesis: an integrated view.  
712 *Clin Microbiol Rev.* 2009;22(4):564-81. doi: 10.1128/cmr.00035-09. PubMed PMID: 19822889.
- 713 51. Korman AM, Alikhan A, Kaffenberger BH. Viral exanthems: An update on laboratory  
714 testing of the adult patient. *J Am Acad Dermatol.* 2017;76(3):538-50. doi:  
715 10.1016/j.jaad.2016.08.034. PubMed PMID: 28413059.

- 716 52. Laksono BM, de Vries RD, McQuaid S, Duprex WP, de Swart RL. Measles Virus Host  
717 Invasion and Pathogenesis. *Viruses*. 2016;8(8). doi: 10.3390/v8080210. PubMed PMID:  
718 27483301.
- 719 53. Ono N, Tatsuo H, Hidaka Y, Aoki T, Minagawa H, Yanagi Y. Measles viruses on throat  
720 swabs from measles patients use signaling lymphocytic activation molecule (CDw150) but not  
721 CD46 as a cellular receptor. *J Virol*. 2001;75(9):4399-401. doi: 10.1128/jvi.75.9.4399-  
722 4401.2001. PubMed PMID: 11287589.
- 723 54. Davis ME, Wang MK, Rennick LJ, Full F, Gableske S, Mesman AW, et al. Antagonism of  
724 the phosphatase PP1 by the measles virus V protein is required for innate immune escape of  
725 MDA5. *Cell Host & Microbe*. 2014;16(1):19-30. doi: S1931-3128(14)00223-6 [pii]  
726 10.1016/j.chom.2014.06.007. PubMed PMID: 25011105.
- 727 55. Ludlow M, de Vries RD, Lemon K, McQuaid S, Millar E, van Amerongen G, et al.  
728 Infection of lymphoid tissues in the macaque upper respiratory tract contributes to the  
729 emergence of transmissible measles virus. *J Gen Virol*. 2013;94(Pt 9):1933-44. doi:  
730 10.1099/vir.0.054650-0. PubMed PMID: 23784446.
- 731 56. de Wit E, Spronken MI, Vervaet G, Rimmelzwaan GF, Osterhaus AD, Fouchier RA. A  
732 reverse-genetics system for Influenza A virus using T7 RNA polymerase. *J Gen Virol*.  
733 2007;88(Pt 4):1281-7. doi: 10.1099/vir.0.82452-0. PubMed PMID: 17374773.
- 734 57. Whistler T, Blackburn N. A rapid culture assay for examining measles virus infections  
735 from urine specimens. *Clin Diagn Virol*. 1997;7(3):193-200. PubMed PMID: 9126689.
- 736
- 737

738 **Fig 1. The appearance of MV-infected cells in the skin precedes the appearance of rash.**

739 Macroscopic evaluation of MV infection in two cynomolgus macaques: animal #38 (a – f) and  
740 animal #37 ((g – l), table S1 in [26]). (a – c; g – i) Normal light: Rash was prominent at 11 dpi.  
741 (d – f; j – l) Fluorescence: MV-infected sites (fluorescence) in the skin preceded the rash at 8  
742 dpi and diminished around 13 dpi.

743

744 **Fig 2. Infection of macaque skin starts in the dermis and spreads to the epidermis.**

745 Immunohistochemical staining of MV-infected macaque skin biopsies collected at 9 (a and d),  
746 11 (b and e) and 13 (c and f) dpi. (a and d) Most MV N<sup>+</sup> cells could be found in the dermal  
747 papillae, although a few single infected cells were detected in the basal layer of the epidermis  
748 at 9 dpi. (b and e) At 11 dpi, prominent infection was observed near hair follicle and sebaceous  
749 gland (arrow). The infection in the epidermis has progressed further in the suprabasal layers  
750 (arrows). (c and f) The infection in the dermis was no longer detected at 13 dpi. The infection  
751 in the epidermis had reached the most superficial layers. (g – i) A syncytium (ellipse) in the  
752 epidermis of macaque skin collected at 9 dpi stained with haematoxylin and eosin (HE), or  
753 with green fluorescence protein (GFP) and MV N antibodies, respectively. Scale bars of (a), (c)  
754 and (g – i): 50  $\mu$ m; Scale bar of (b): 100  $\mu$ m; Scale bars of (d – f): 20  $\mu$ m.

755

756 **Fig 3. The phenotypes of MV-infected cells in the dermis and epidermis throughout the**

757 **course of infection.** Serial sections of skin (top to bottom) of three macaques (left to right)  
758 euthanised at three different time points (indicated above). The sections were double-stained  
759 with antibodies to EGFP (green) and several cell-specific markers (red), as indicated on the  
760 left of each row. (a) At 9 dpi, MV-infected CD45<sup>+</sup> white blood cells (inset, arrow) could be  
761 detected in the superficial dermis. (b) Some of these MV-infected white blood cells were CD3<sup>+</sup>

762 T cells, which were present in the dermis, mostly in a more basal area, with speckled GFP  
763 signal in their cytoplasm (inset, arrow). (c) MV-infected S100A8/A9 complex<sup>+</sup> macrophages  
764 (inset, arrow) were also found abundantly in the superficial dermis. (d) MV-infected cells in  
765 the dermis were often found in or around CD31<sup>+</sup> blood vessels (inset). (e) In the epidermis,  
766 MV-infected cells were mostly keratinocytes (inset, arrow), although MV-infected non-  
767 keratinocyte cells (inset, asterisk) were observed in the basal epidermis. (f) At 11 dpi, MV-  
768 infected white blood cells (inset, arrow), which were (g) T cells in the dermal papillae (inset,  
769 arrow) were in close proximity to (h) uninfected macrophages (inset) and (i) blood vessels. (j)  
770 The infection in keratinocytes had progressed apically and laterally. (k – o) MV-infected cells  
771 had mostly disappeared from the dermis at 13 dpi. The dermis and epidermis were filled with  
772 white blood cells. Dm: Dermis; Ep: Epidermis. Scale bar: 50  $\mu$ m.

773

774 **Fig 4. The location of MV-infected cells and the interaction with other cells in their proximity.**

775 (a – f) MV-infected cells in the dermis and (g – l) in the epidermis. (a) MV-infected CD45<sup>+</sup> white  
776 blood cells (arrow) in the dermis, especially near the basal layer of the epidermis. (b) MV-  
777 infected CD3<sup>+</sup> T cells, although mostly found in the dermal papillae at 9 and 11 dpi, in reticular  
778 dermis at 13 dpi, surrounded by uninfected T cells. (c) MV-infected cell in the dermis  
779 interacted with HLA-DR<sup>+</sup> APC, forming a long EGFP<sup>+</sup> dendrite (arrow). (d) More often, MV-  
780 infected cells (arrow) located around or in blood vessels and, (e) rarely, MV-infected  
781 endothelial cells (arrow) could be found together with those cells. (f) Spindle- or dendritic-  
782 like MV-infected cells were negative for all tested cell markers. (g – i) In the epidermis, MV-  
783 infected white blood cells could be found since 11 dpi, either interacting with other white  
784 blood cells (g) or other MV-infected epidermal cells (h). (i) White blood cells appeared to  
785 infiltrate the MV-infected cells in the epidermis. (j – k) Serial slides of MV-infected epidermis

786 at 13 dpi. MV-infected white blood cells that were negative for cytokeratin marker could be  
787 found in the basal layer of the epidermis, presumably Langerhans cells. These cells were in  
788 close proximity with infected keratinocytes (k). (l) MV-infected keratinocytes in the absence  
789 of other cells. Scale bars of (a – d), (f), (g) and (j – l): 10  $\mu\text{m}$ ; Scale bars of (e) and (h – i): 20  
790  $\mu\text{m}$ .

791

792 **Fig 5. *Ex vivo* MV infection of human epidermis and dermis sheets.** (a) MV<sup>+</sup> cells (green) were  
793 detectable as early as 2 dpi in the epidermis and were present in higher numbers in the dermis  
794 than in the epidermis. (b) Percentages of infected cells in each cell subset of lymphocyte and  
795 non-lymphocyte populations isolated from epidermis, dermis and full skin at 2, 4 and 7 dpi.  
796 APC: antigen-presenting cell. Scale bars: 200  $\mu\text{m}$ .

797

798 **Fig 6. The susceptibility of proliferating and differentiated keratinocytes to *in vitro* MV**  
799 **infection.** A higher number of infected keratinocytes (green) was detected in differentiated  
800 than in proliferating cultures, regardless of MV strain. All experiments were done in duplicate.  
801 NCI-H358: human broncho-alveolar carcinoma cell line; BLCL: EBV-transformed B-  
802 lymphoblastoma cell line. HD1 or HD2: primary keratinocyte culture from healthy donor 1 or  
803 2; EDSS: primary keratinocyte culture from EDSS patient; KS: rMV<sup>KS</sup>Venus(3); IC323:  
804 rMV<sup>IC323</sup>EGFP(1); N4B: rMV<sup>KS-N4b</sup>EGFP(3). Scale bars: 200  $\mu\text{m}$ .

805

806 **Fig 7. Production of cell-free virus by MV-infected proliferating and differentiated**  
807 **keratinocytes and susceptibility of HEK 293T cells transiently expressing wild-type or**  
808 **mutant nectin-4 to MV infection.** (a) MV-infected proliferating and differentiated  
809 keratinocytes of an EDSS patient produced a comparable amount of cell-free virus to that of

810 the healthy donors. (b) Expression of nectin-4 on HEK 293T cells was measured prior to  
811 infection (left graph). Venus fluorescence was detected in these cells after 24 h of infection  
812 (right graph). Mock cells were taken as control for transfection and infection. HEK 293T cells  
813 were transfected with plasmid containing wild-type or mutant p.Thr185Met insert. All  
814 experiments were done in duplicate. HD1 or HD2: primary keratinocyte culture from healthy  
815 donor 1 or 2; EDSS: primary keratinocyte culture from EDSS patient; KS: rMV<sup>KS</sup>Venus(3);  
816 IC323: rMV<sup>IC323</sup>EGFP(1); KS-N4B: rMV<sup>KS-N4b</sup>EGFP(3); N4-wt: wild-type nectin-4; N4-185: nectin-  
817 4-T185M.

818

819 **Fig 8. Model for pathogenesis of measles skin rash.** During viremia, MV-infected T cells and  
820 macrophages migrate to the dermis via the capillaries and interact with (a) tissue-resident  
821 lymphoid and myeloid cells and epidermal LCs residing near the basal lamina. This interaction  
822 leads to the infection of surrounding CD150<sup>+</sup> tissue-resident immune cells and nectin-4<sup>+</sup>  
823 epithelial cells. Alternatively, MV-infected T cells and macrophages migrate in close proximity  
824 to: (b) the hair follicle or (c) the sebaceous gland via the capillary, where they infect an  
825 aggregate of tissue-resident T cells and macrophages, and further spread the infection to  
826 nearby keratinocytes and LCs. Infection of basal keratinocytes leads to lateral and apical  
827 spread of the virus to the superficial layers of the epidermis. Several days later, (d)  
828 hyperaemic responses allow the recruitment of MV-specific CD8<sup>+</sup> cytotoxic T cells and  
829 macrophages, resulting in (e) recognition and (f) clearance of the infected cells. Hyperaemia  
830 and subsequent oedema are the histological correlates of maculopapular erythematous  
831 measles rash.

832

833 **S1. MV-infected LCs were not observed after *ex vivo* infection of human epidermal sheets.**

834 LCs (magenta) were present in abundance in human epidermal sheets. MV-infected cells  
835 (green) appeared at 2 dpi and their number increased by 4 dpi. However, none of these  
836 infected cells were LCs. Magenta: CD1a; Green: GFP; Blue: DAPI. Scale bars: 200  $\mu$ m.

837

838 **S2. Nectin-4 was expressed at a relatively low level in proliferating human primary**

839 **keratinocytes.** The expression level increased during differentiation. The expression of  
840 nectin-4 was abrogated in EDSS patient's keratinocytes and differentiation did not result in  
841 increased nectin-4 expression. NCI-H358 and BLCL were included as positive and negative  
842 controls of nectin-4 expression, respectively.

843



**8 dpi****11 dpi****13 dpi**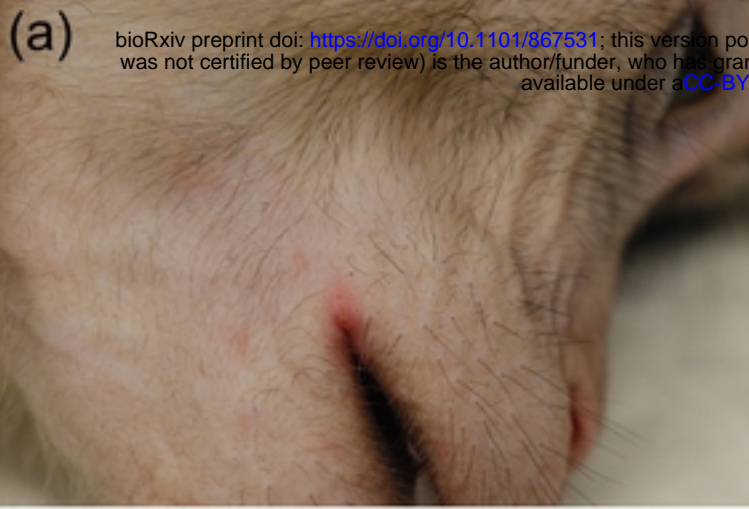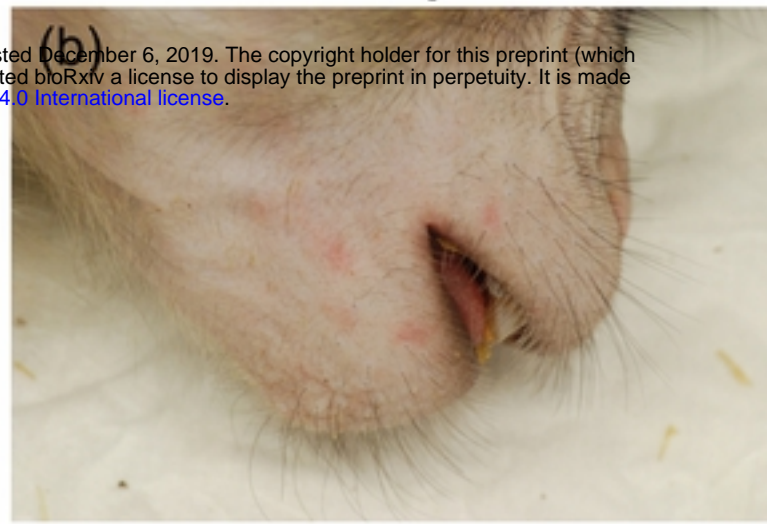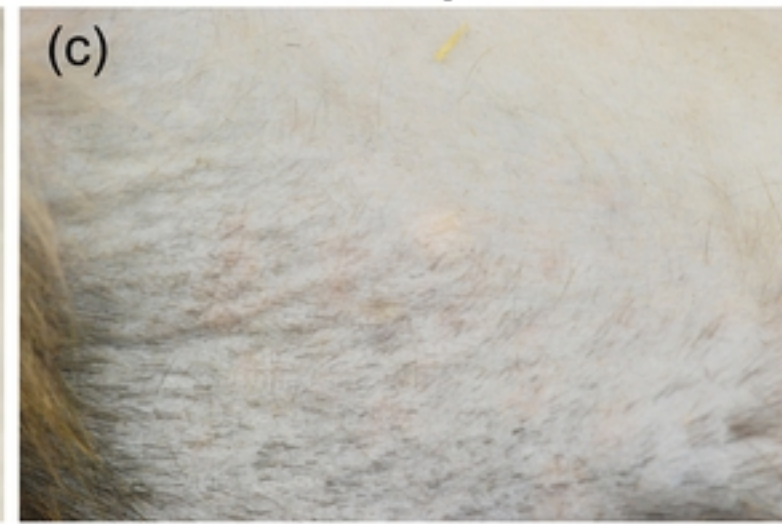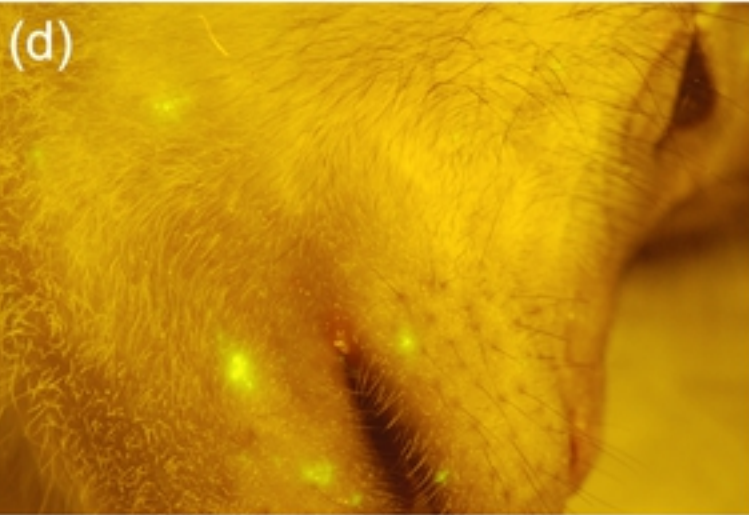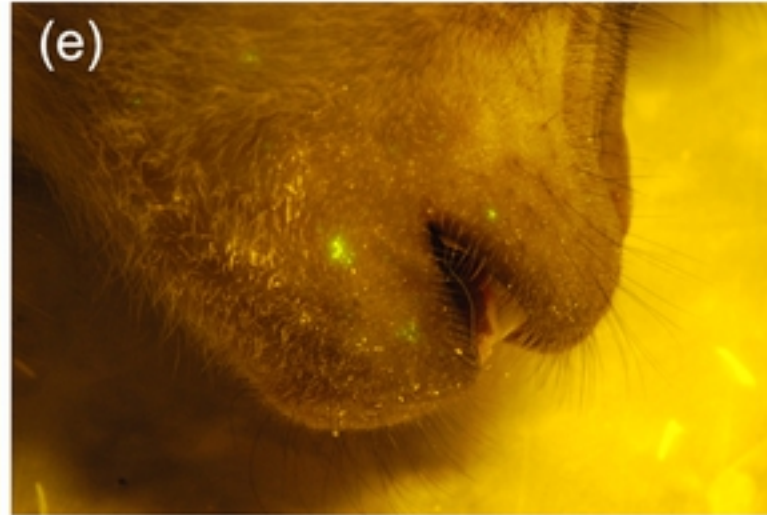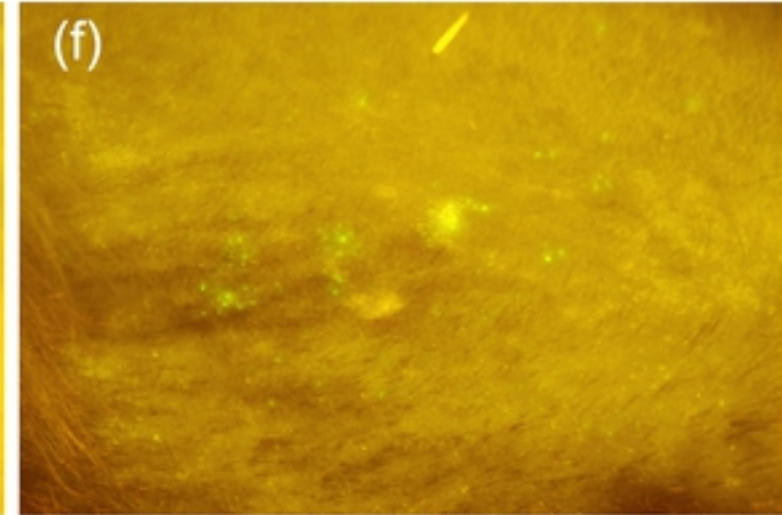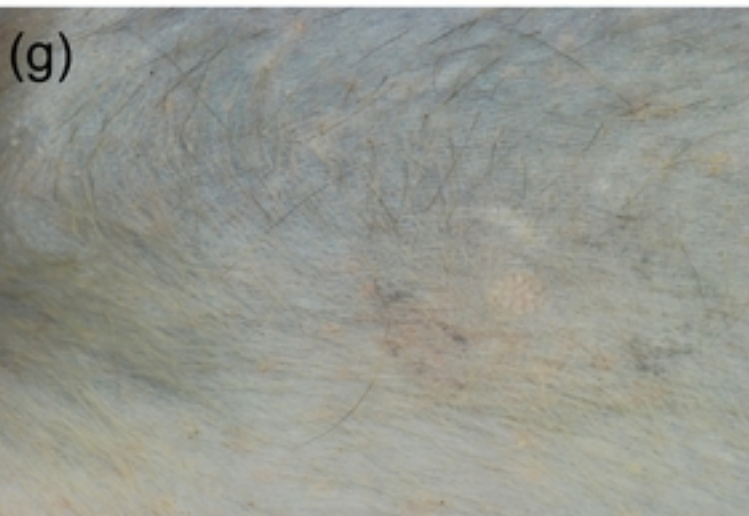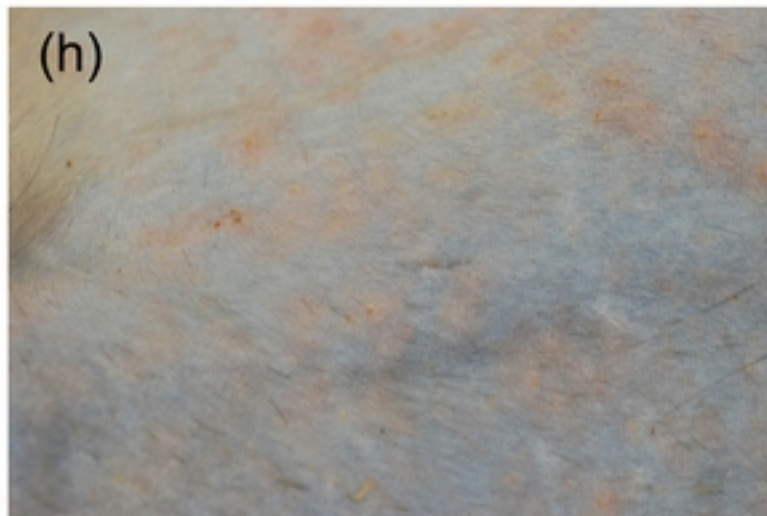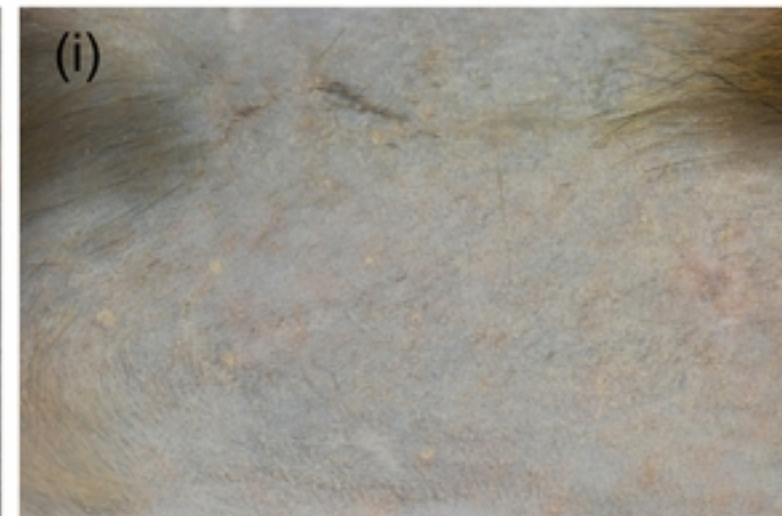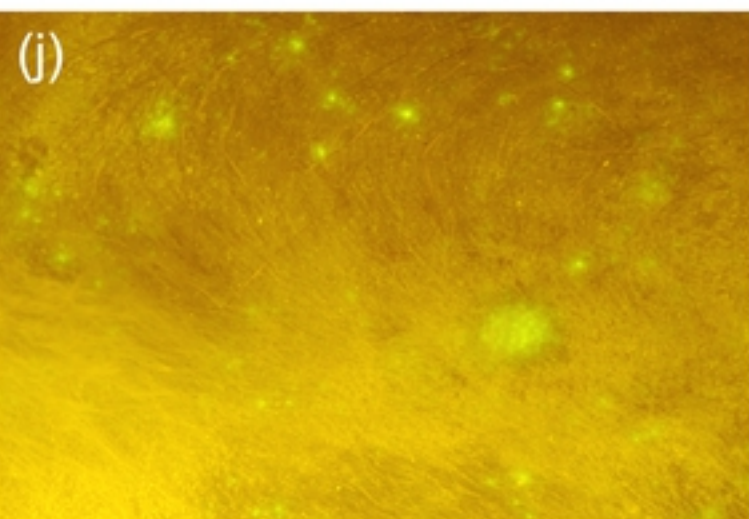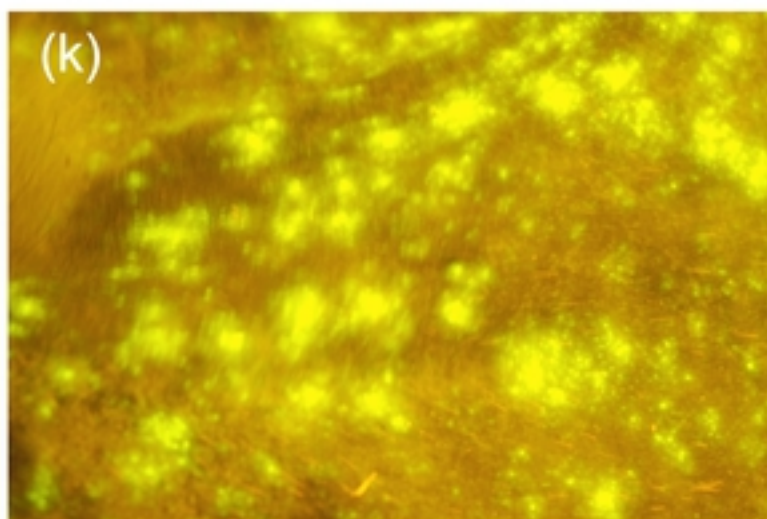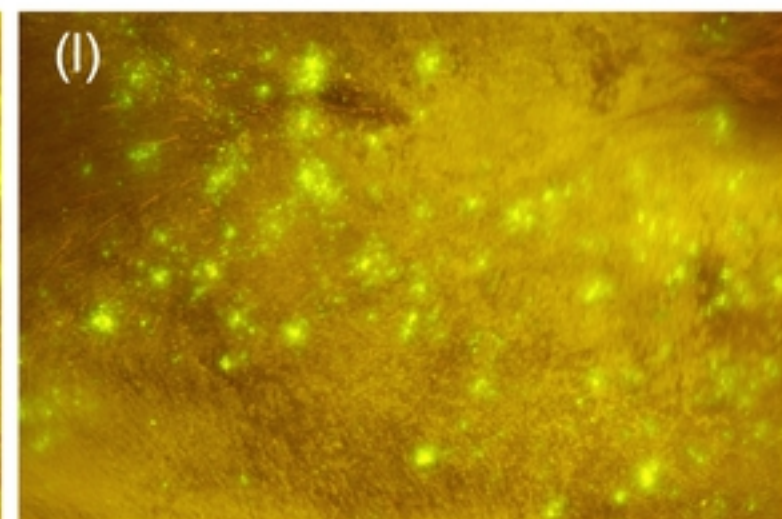**Figure 1**



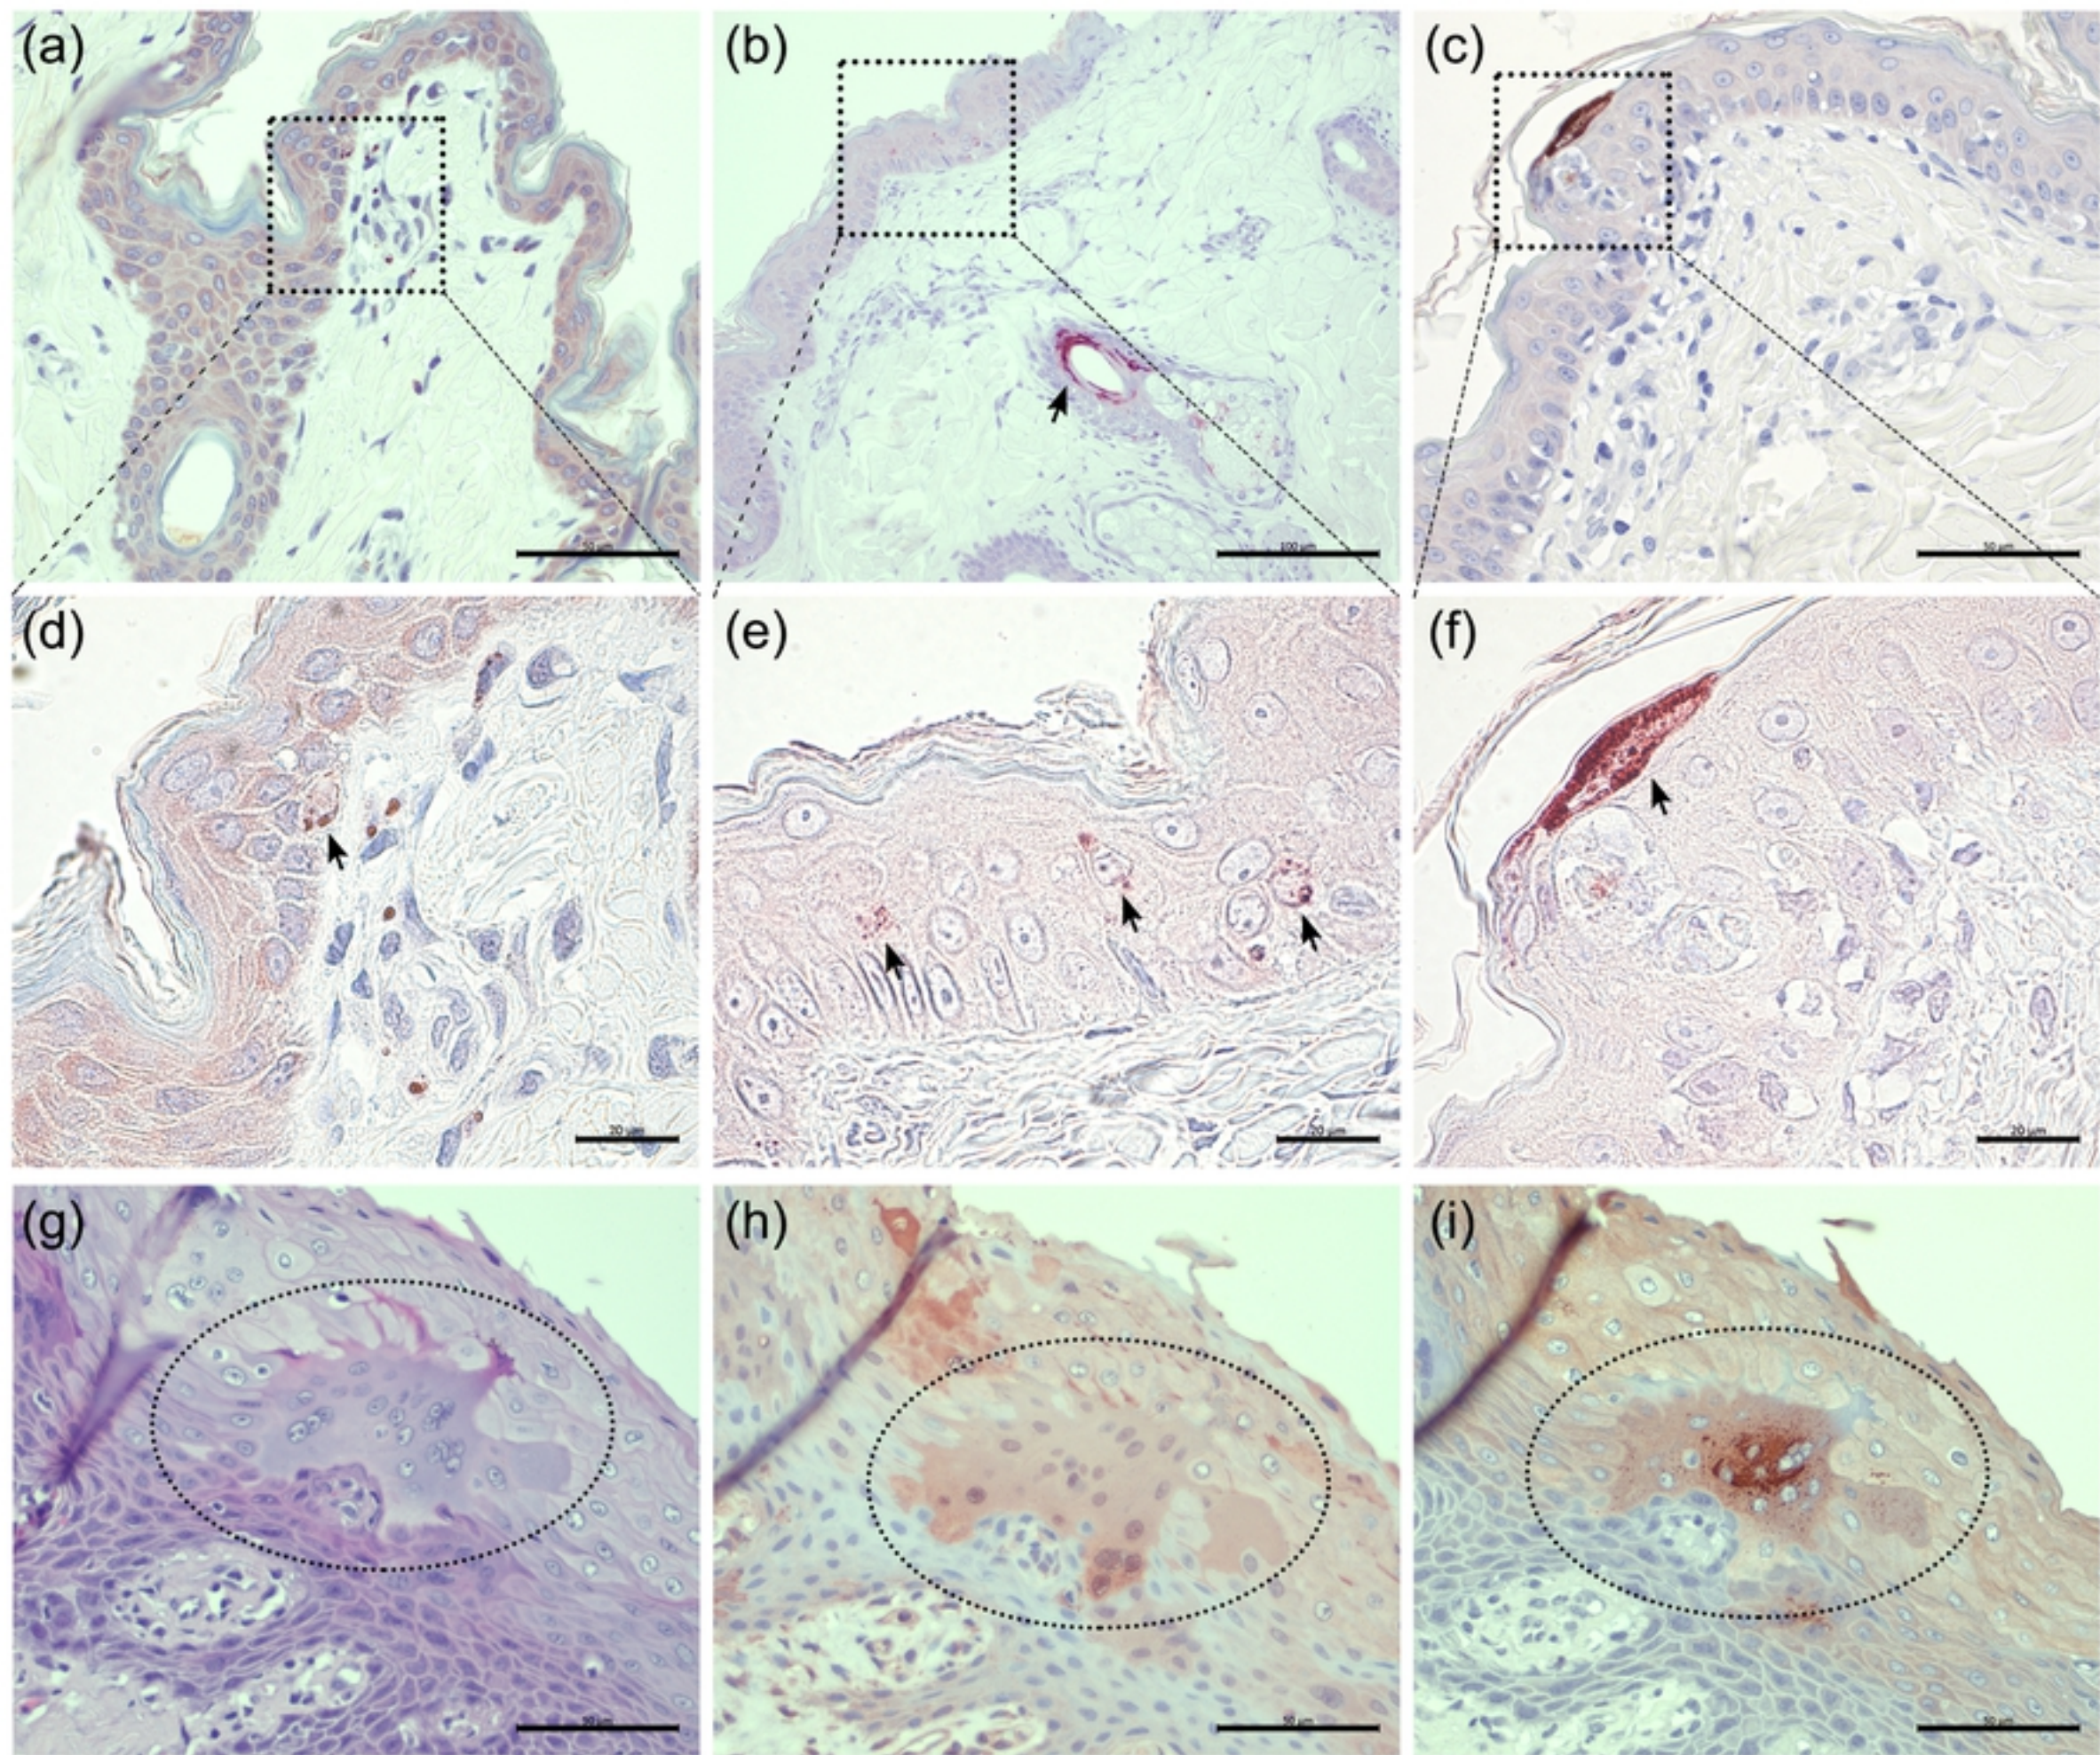

Figure 2







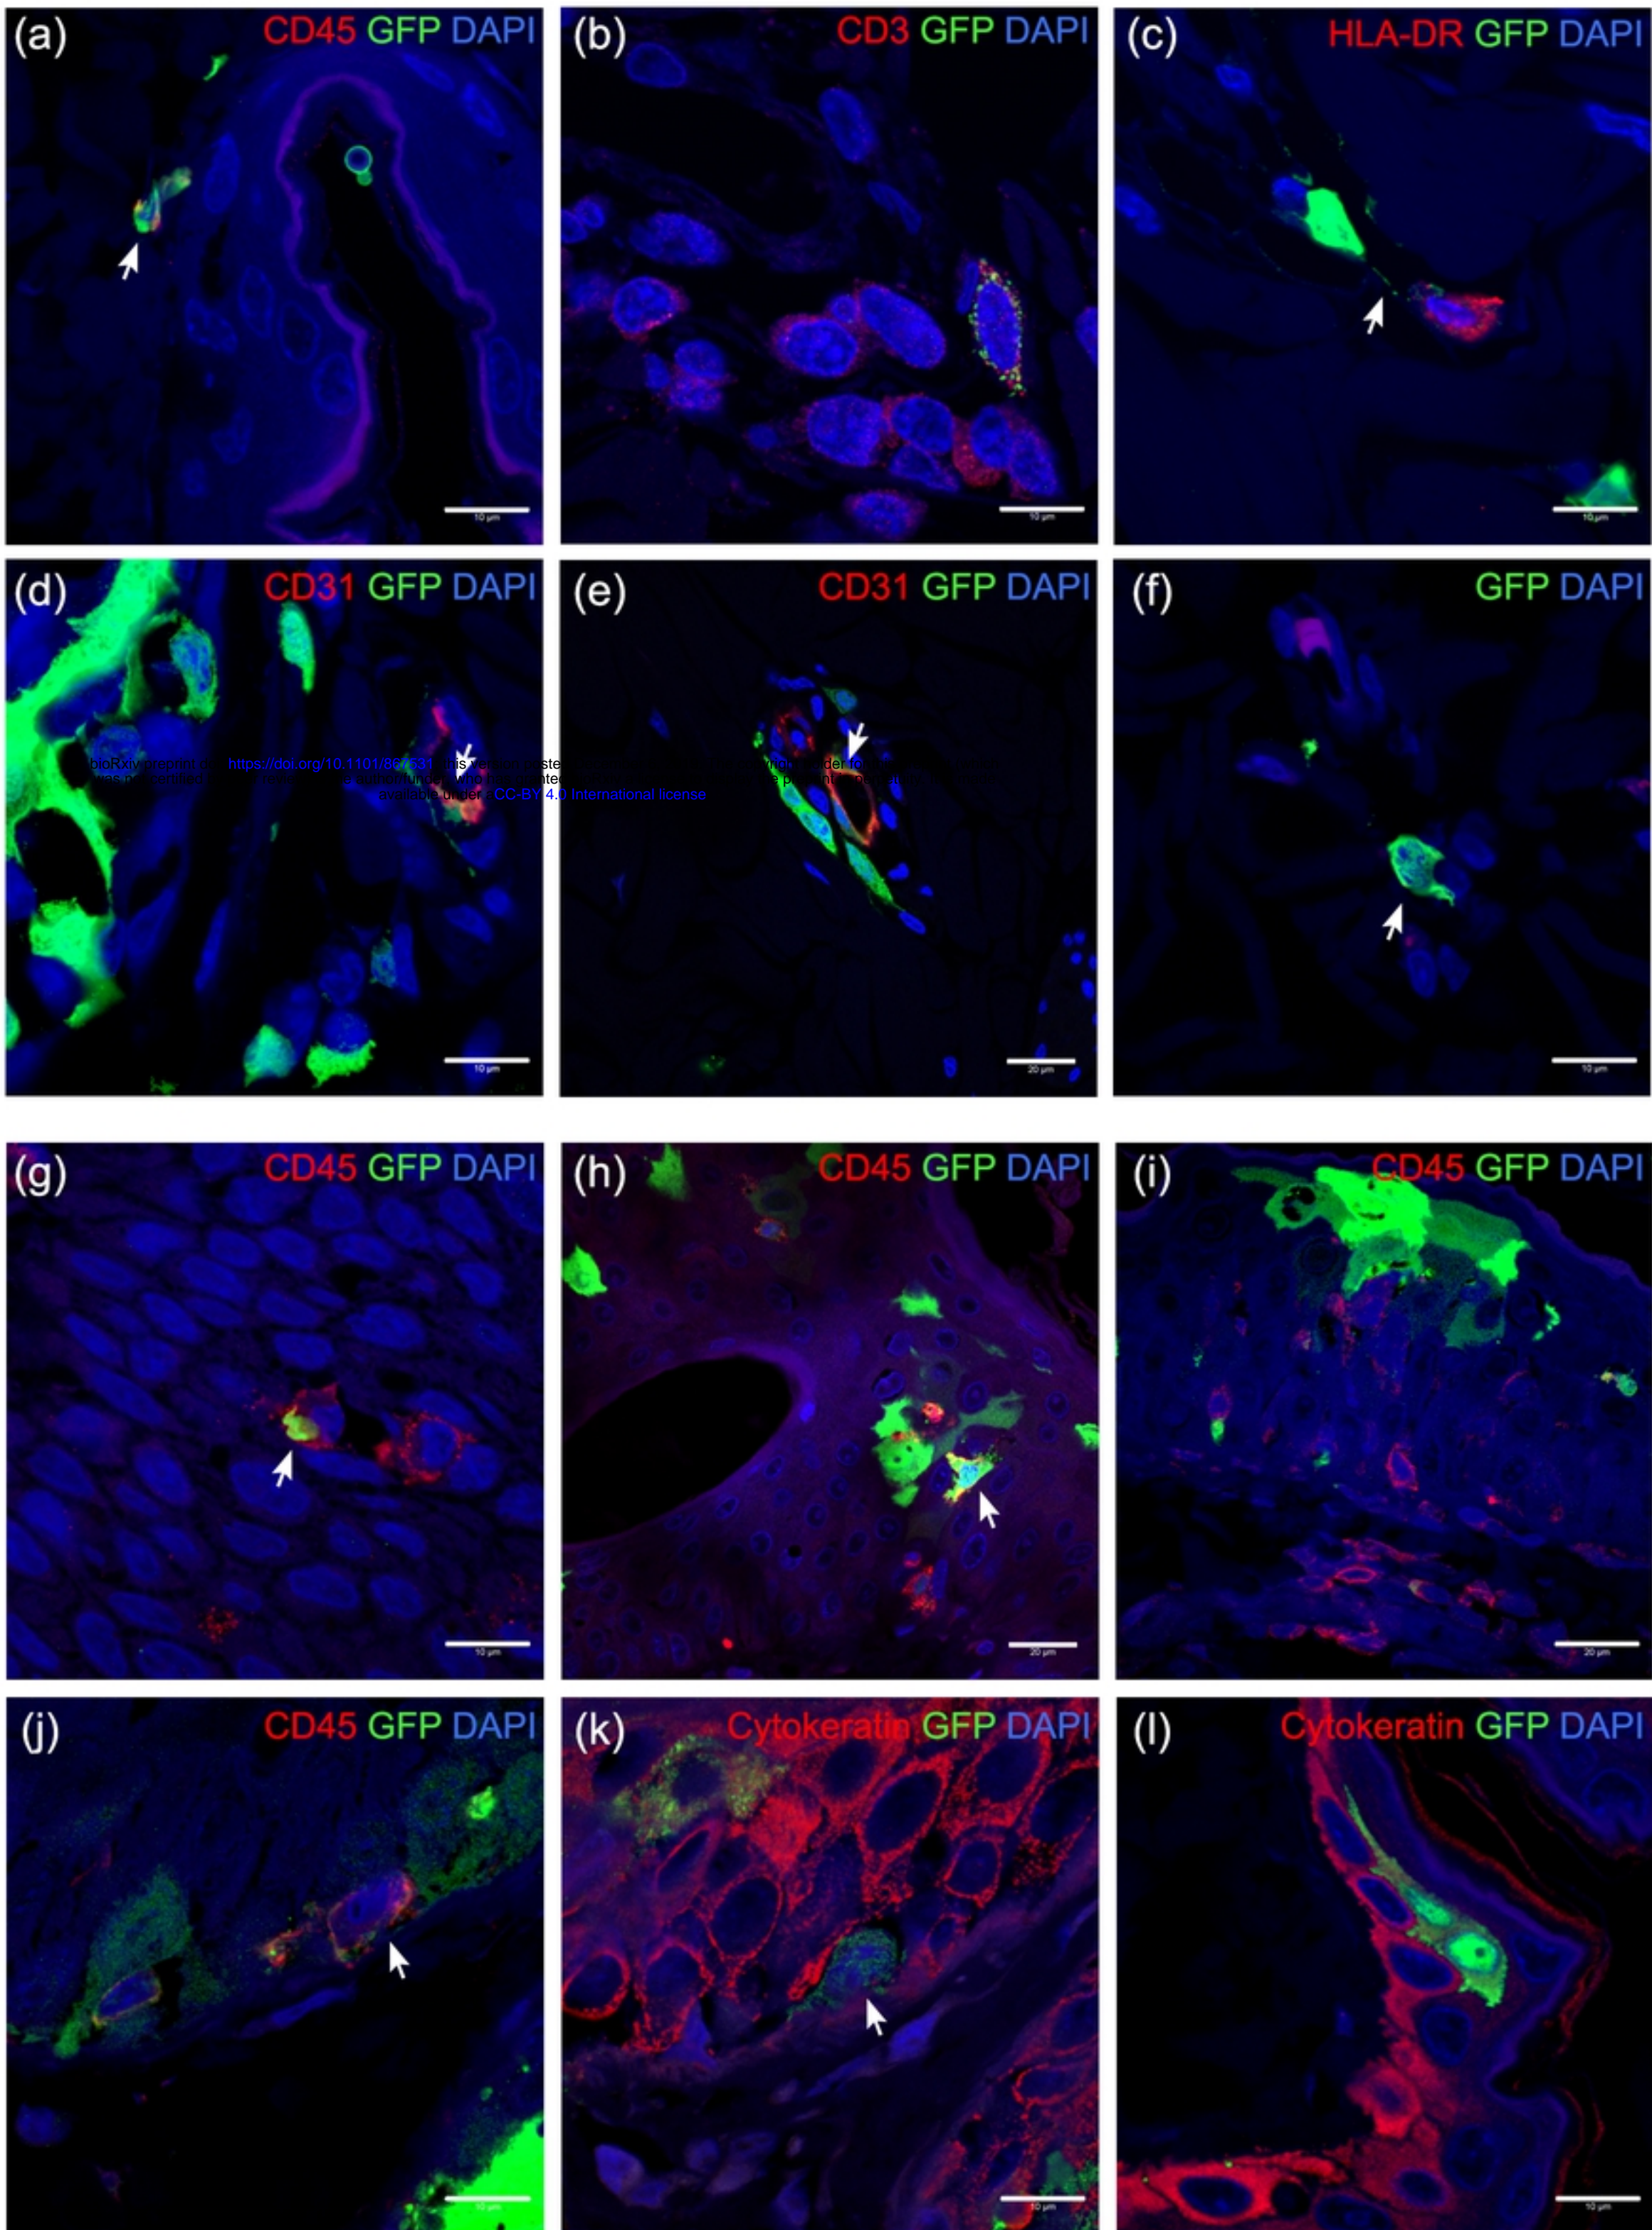

Figure 4



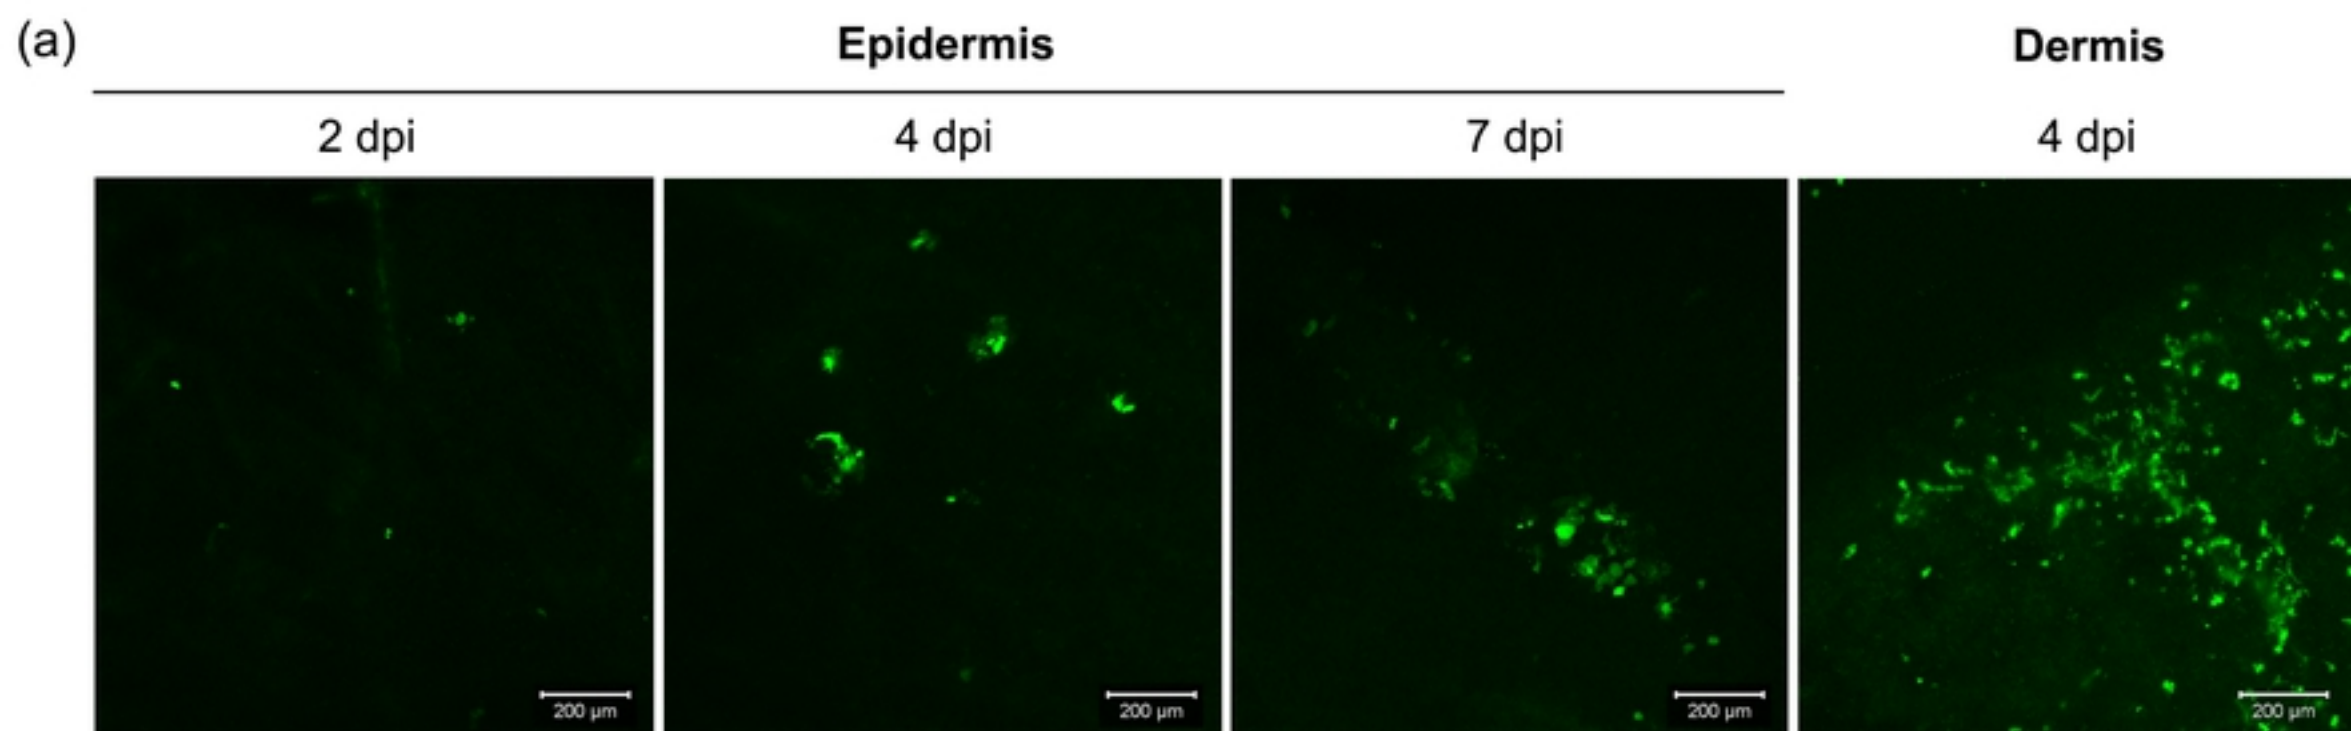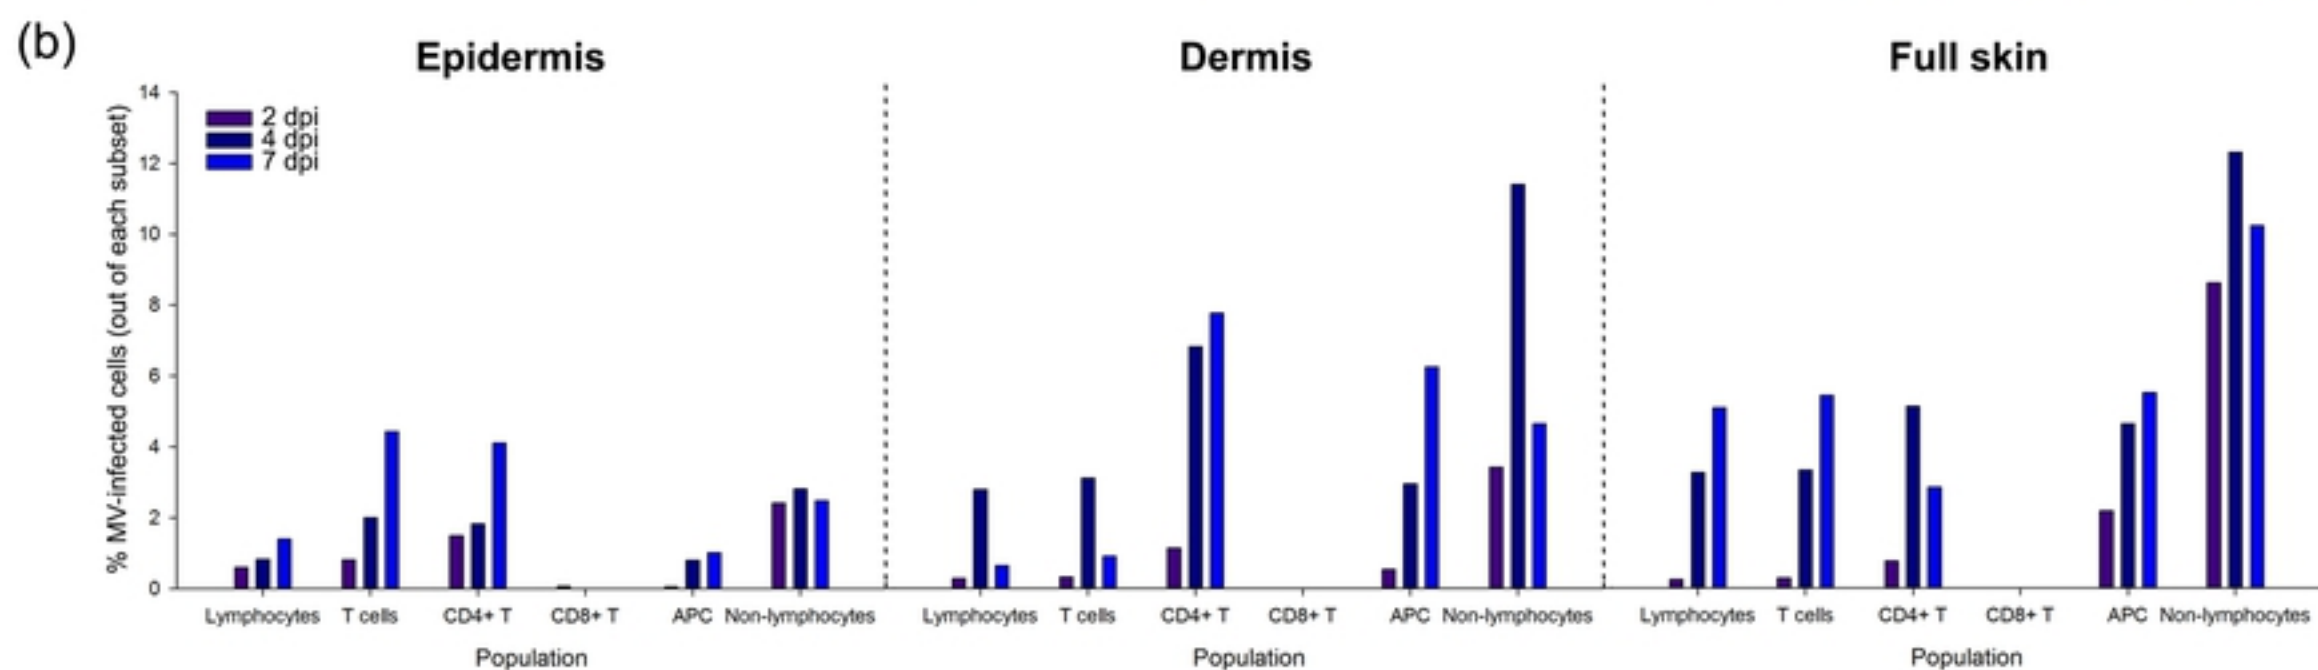

Figure 5

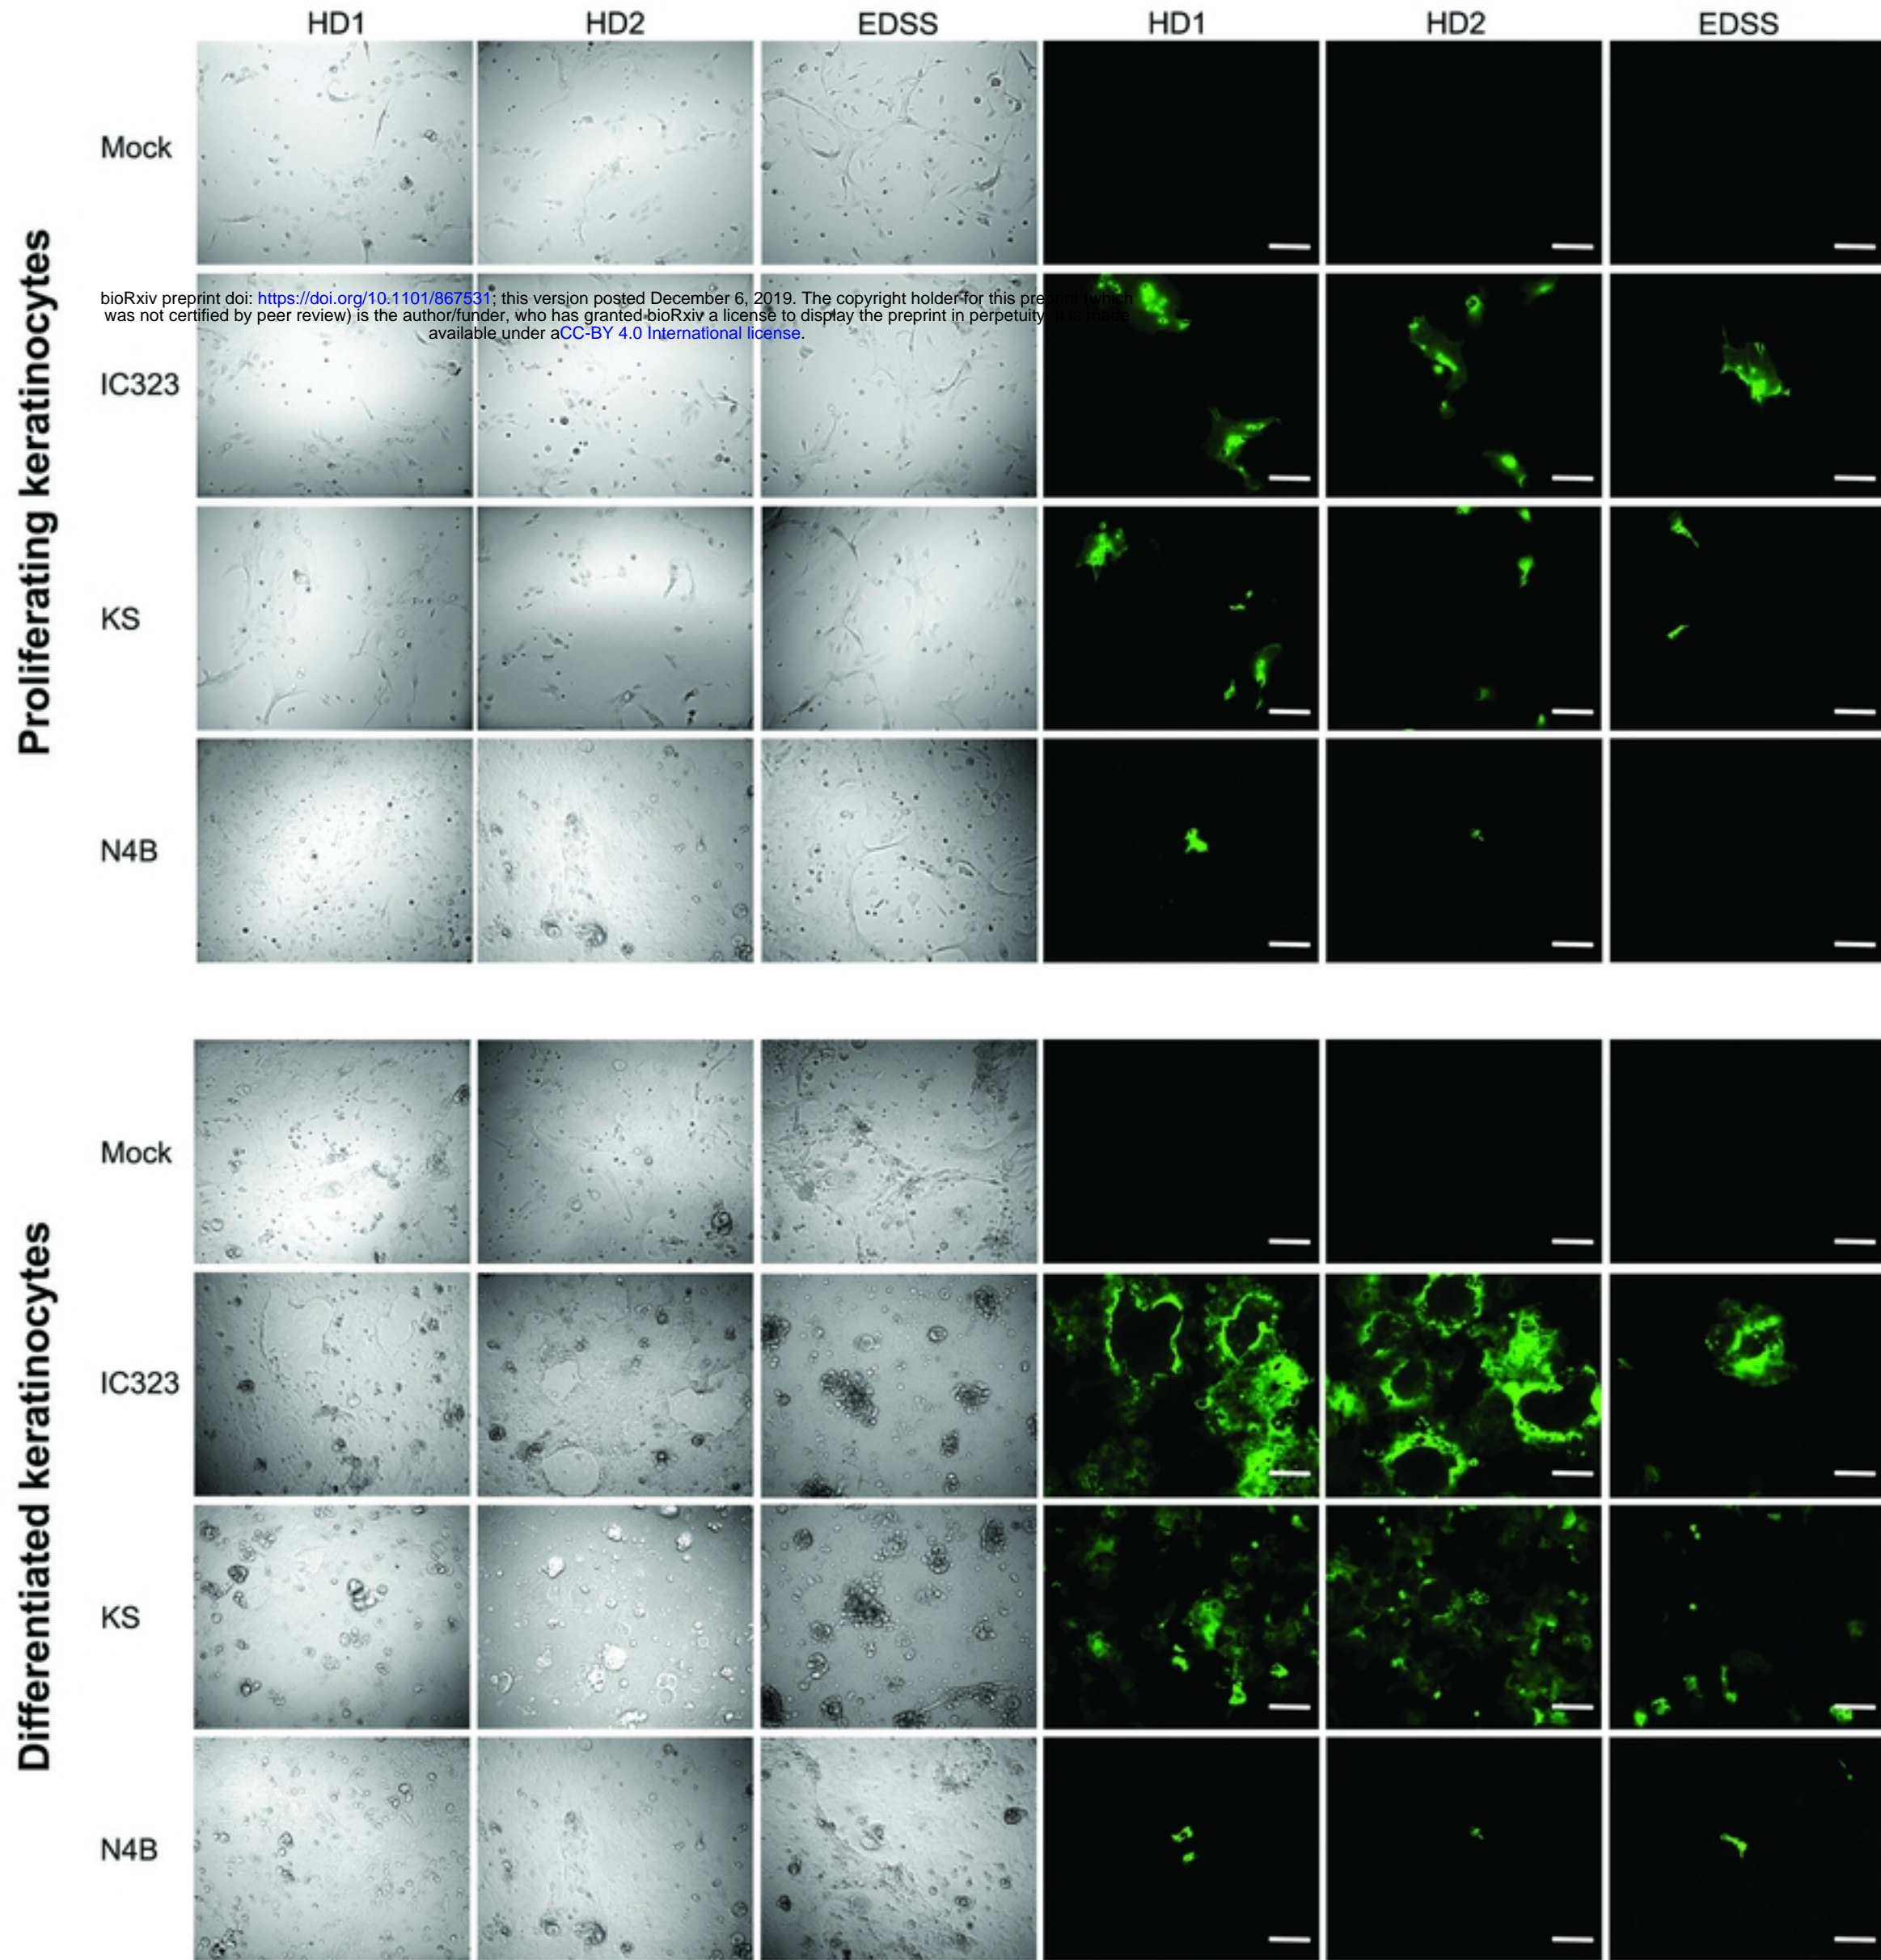

Figure 6



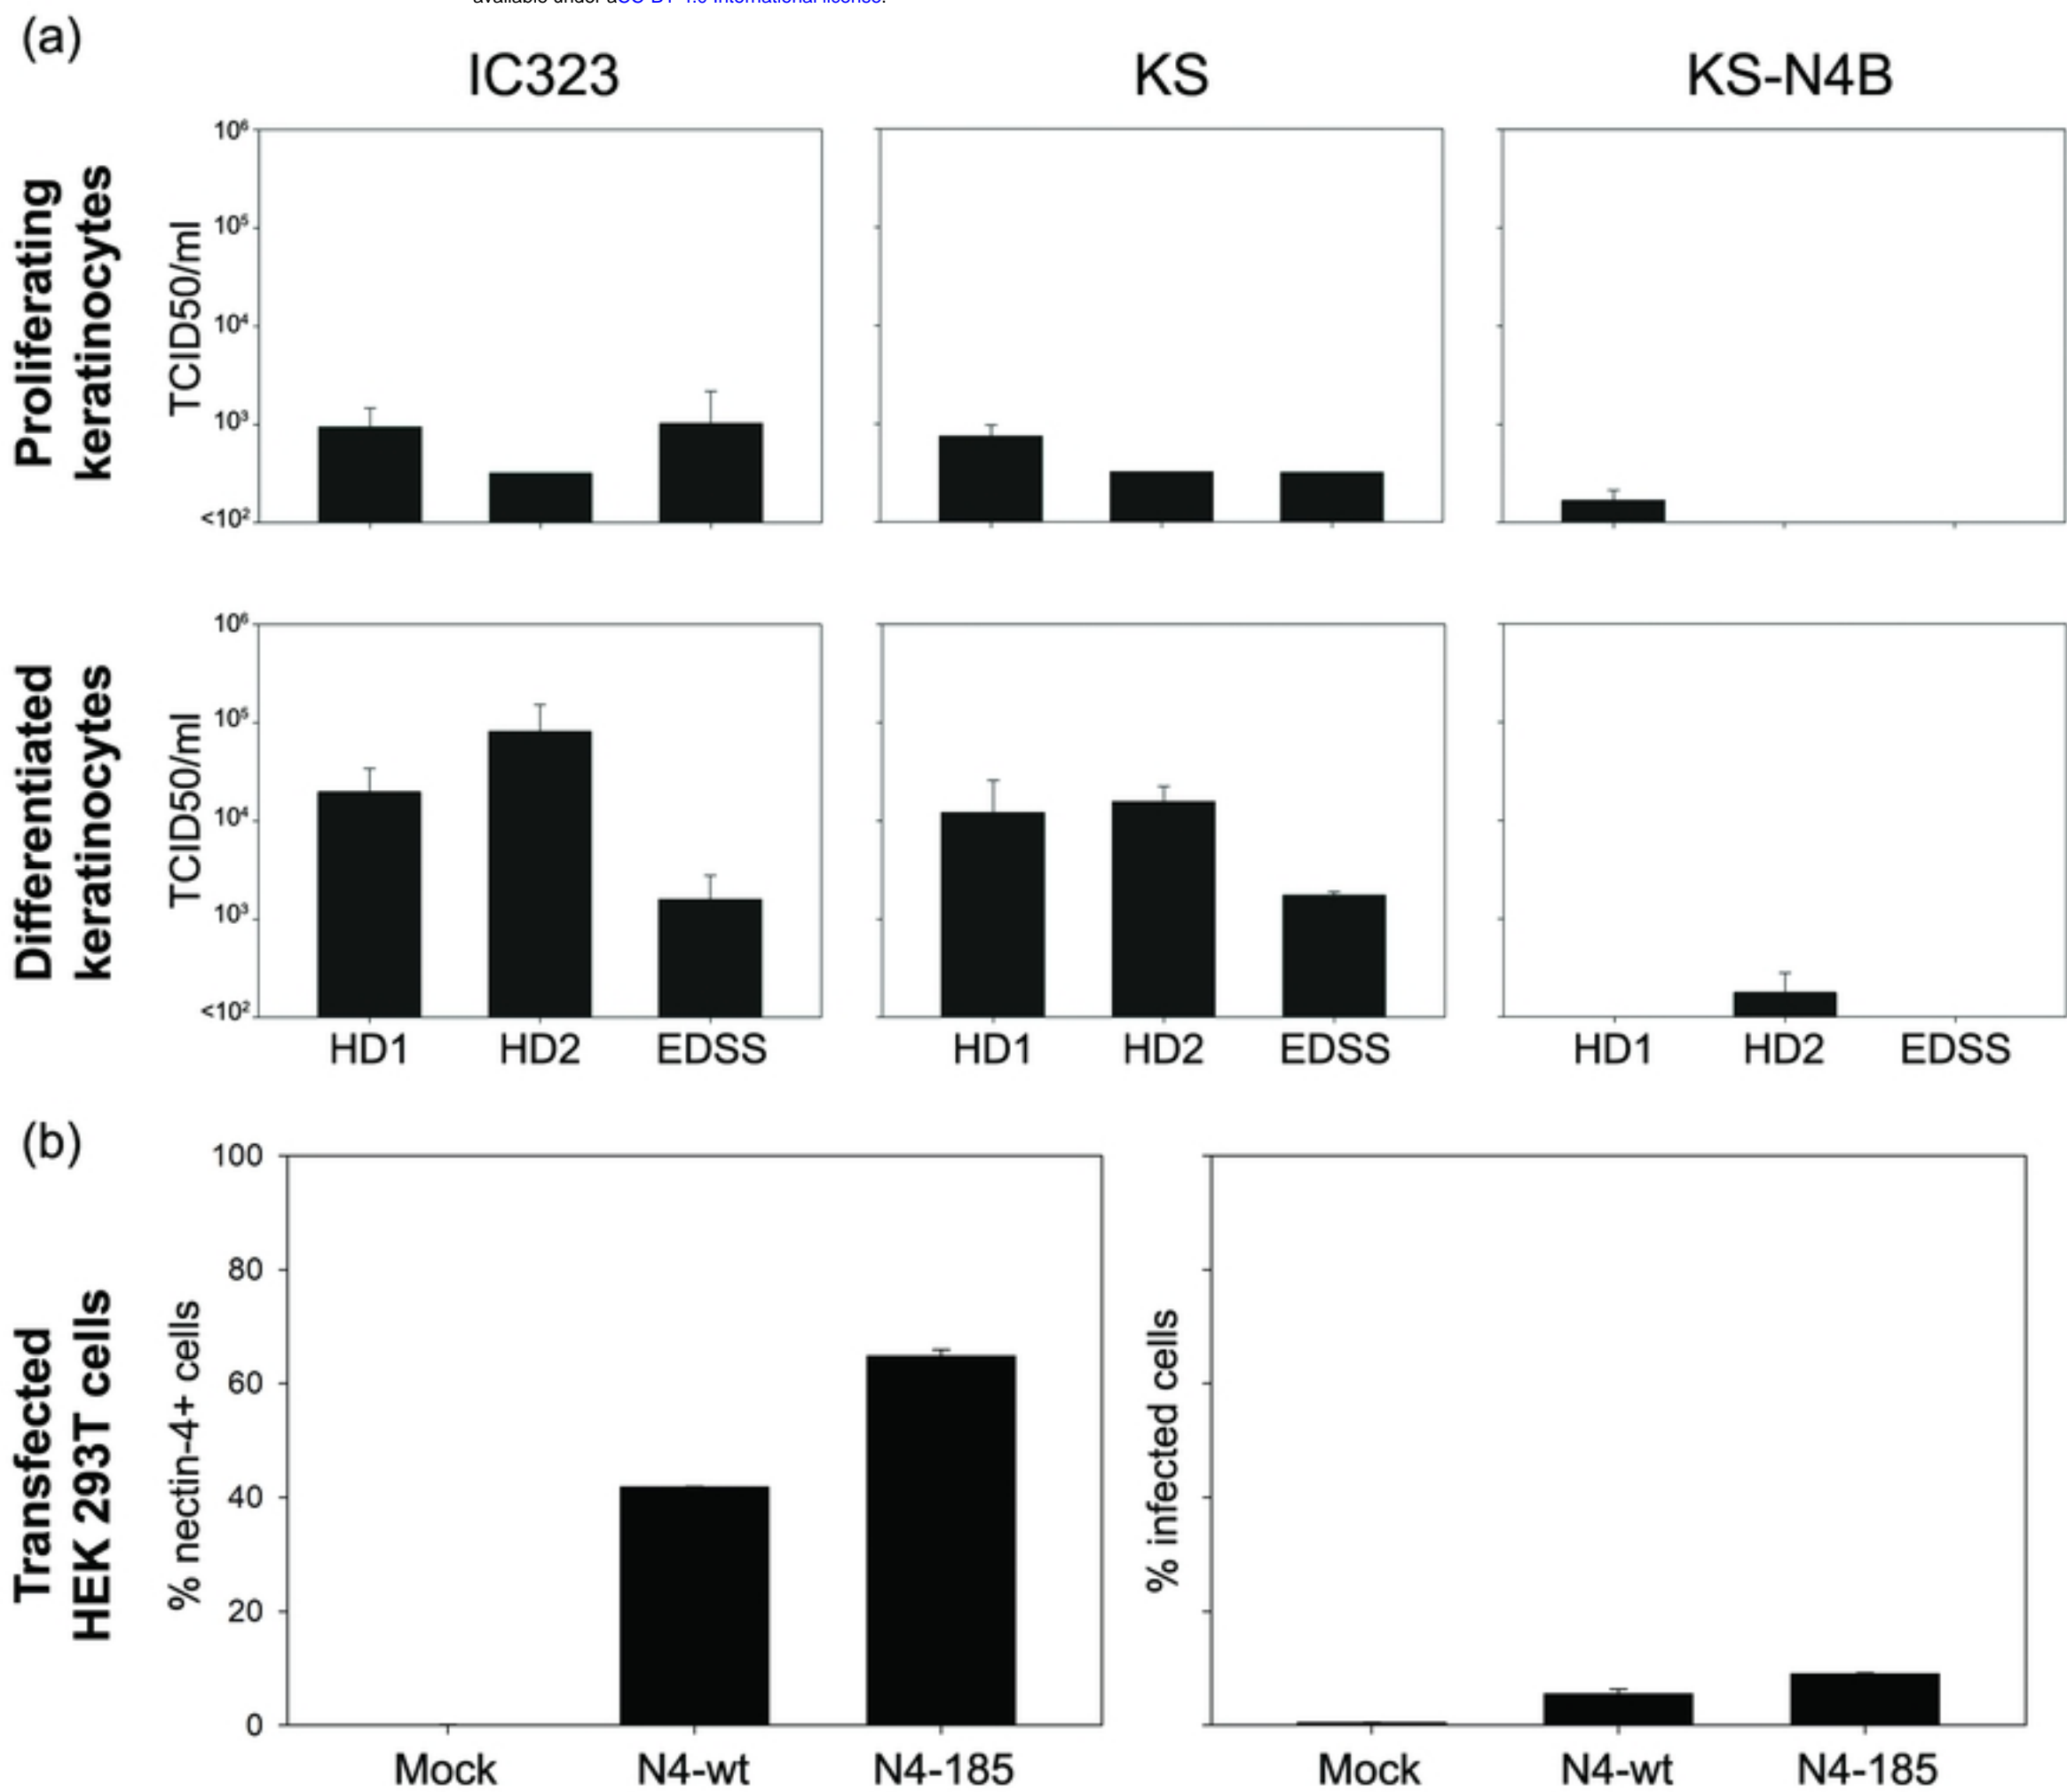

Figure 7

7 - 9 dpi

11 - 13 dpi

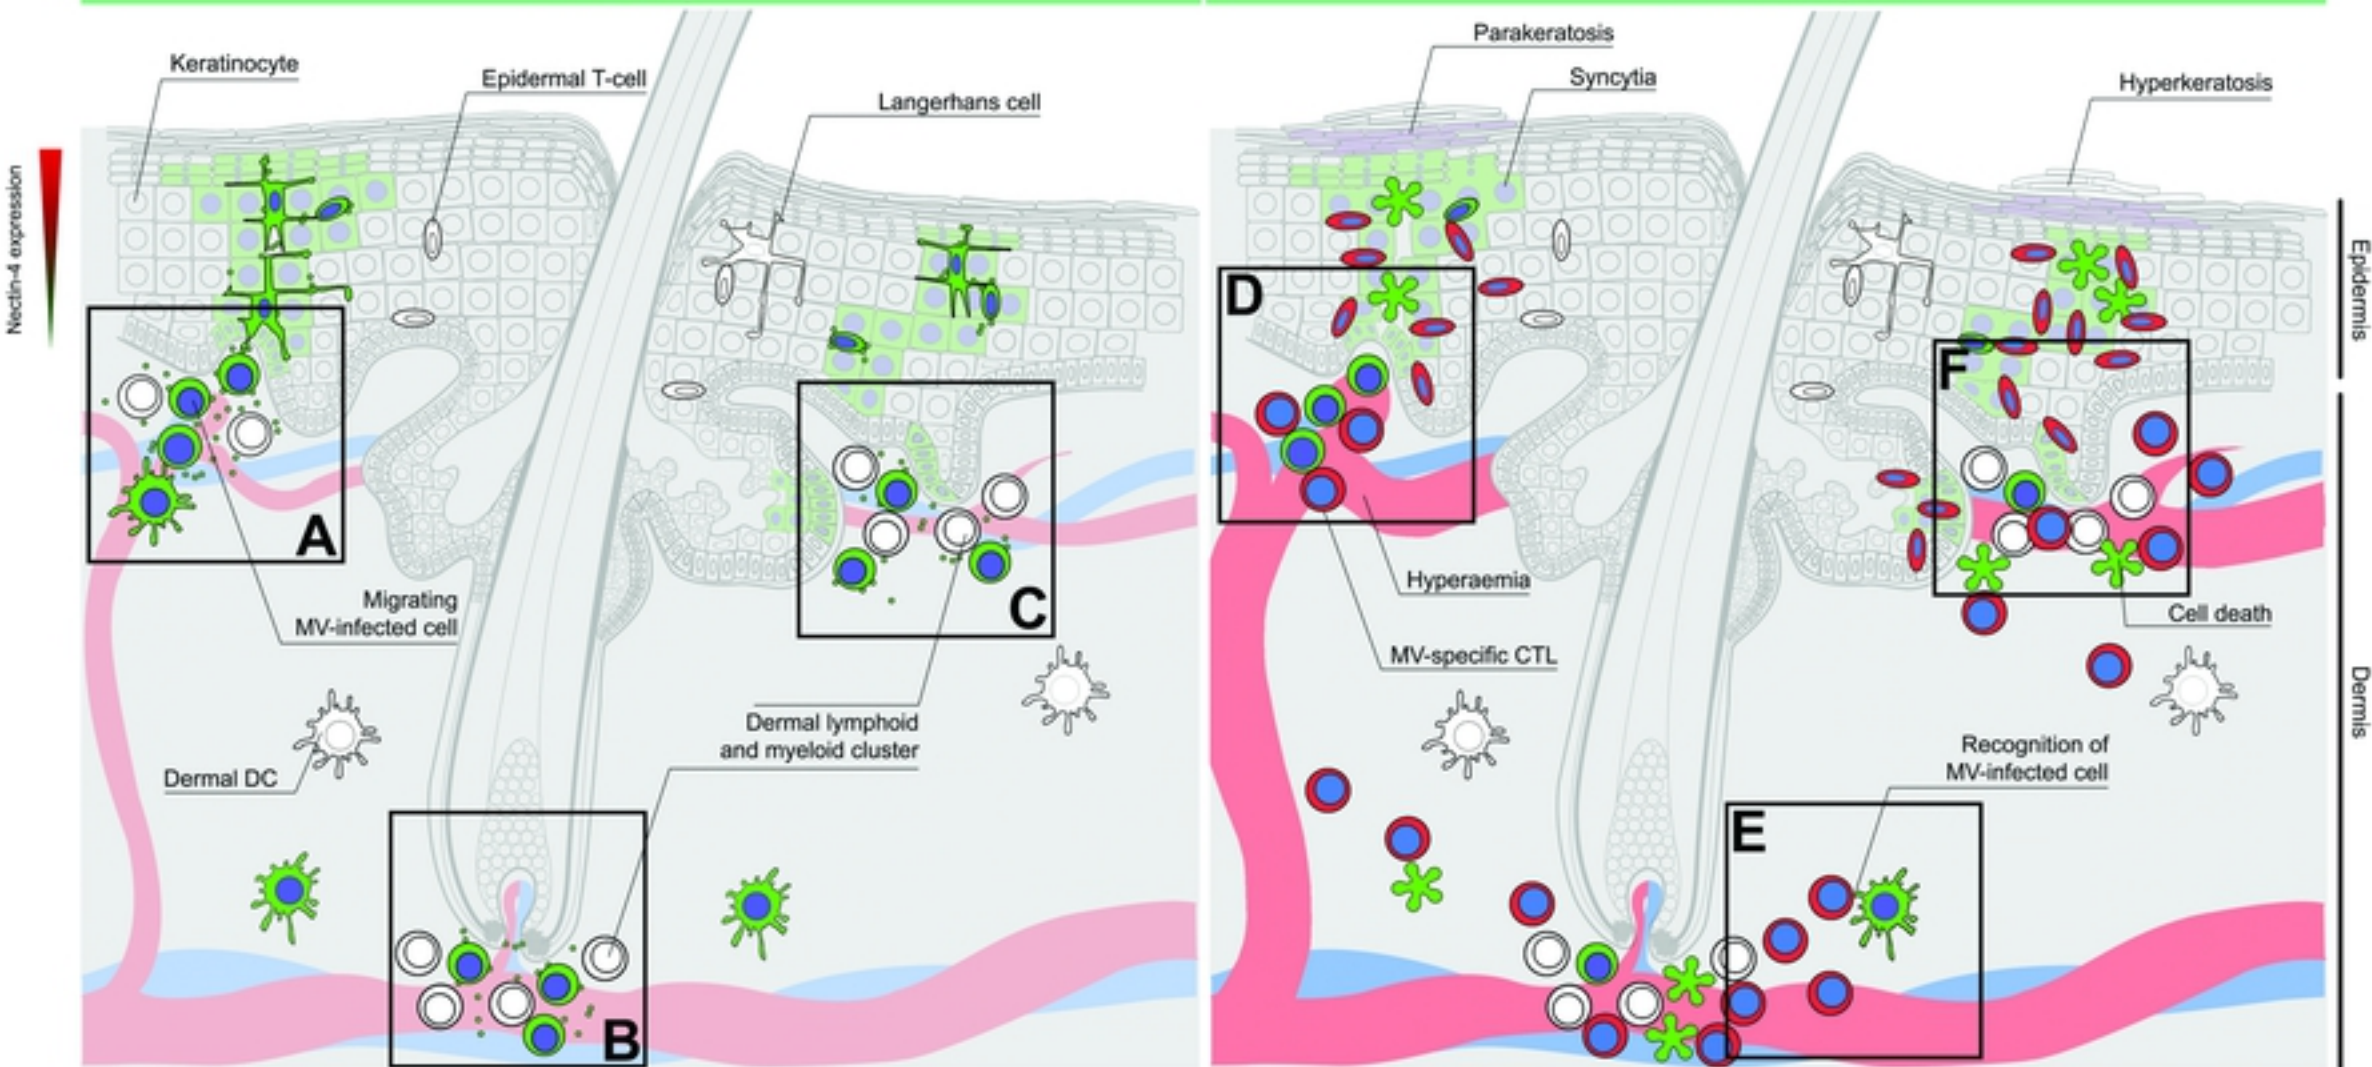

Figure 8
